1 **A metagenomic view of novel microbial and metabolic diversity found within the deep**  
2 **terrestrial biosphere**

3 **Running title:** Metagenomic analysis of deep terrestrial fracture fluids

4 **Authors:** Lily Momper<sup>1</sup>, Caitlin P. Casar<sup>1</sup>, and Magdalena R. Osburn<sup>1\*</sup>

5 <sup>1</sup>Department of Earth and Planetary Sciences, Northwestern University, Evanston IL, USA

6 Subject Category: Integrated genomics and post-genomics approaches in microbial ecology

7

8 Conflict of Interest Statement: the authors have no conflict of interest to report

9

10 This work was funded by the NASA Exobiology Program (NNX15AM086), David and Lucile  
11 Packard Foundation, and Canadian Institute for Advanced Research (Earth 4D).

12

13 \*Correspondence: Magdalena R. Osburn

14 Northwestern University

15 Department of Earth and Planetary Sciences

16 2145 Sheridan Road, Technological Institute F379

17 Evanston IL, 60208

18 E-mail: [maggie@northwestern.edu](mailto:maggie@northwestern.edu)

19

20

21

## 22 **ABSTRACT**

23 The deep terrestrial subsurface is a large and diverse microbial habitat and a vast repository of  
24 biomass. However, in relation to its size and physical heterogeneity we have limited  
25 understanding of taxonomic and metabolic diversity in this realm. Here we present a detailed  
26 metagenomic analysis of samples from the Deep Mine Microbial Observatory (DeMMO)  
27 spanning depths from the surface to 1.5 km deep in the crust. From these eight geochemically  
28 and spatially distinct fluid samples we reconstructed ~600 metagenome assembled genomes  
29 (MAGs), representing 50 distinct phyla and including 18 candidate phyla. These novel clades  
30 include many members of the Patescibacteria superphylum and two new MAGs from candidate  
31 phylum OLB16, a phylum originally identified in DeMMO fluids and for which only one other  
32 MAG is currently available. We find that microbes spanning this expansive phylogenetic  
33 diversity and physical space are often capable of numerous dissimilatory energy metabolisms  
34 and are poised to take advantage of nutrients as they become available in relatively isolated  
35 fracture fluids. This metagenomic dataset is contextualized within a four-year geochemical and  
36 16S rRNA time series, adding another invaluable piece to our knowledge of deep subsurface  
37 microbial ecology.

38 **Keywords:** Subsurface biosphere/geomicrobiology/carbon fixation/environmental  
39 metagenomics/metagenome assembled genomes

## 40 **INTRODUCTION**

41 Earth's deep biosphere is a vast repository of microbial biomass. Although the size of this  
42 biosphere has been continually refined, the most recent estimates now suggest that it is one of the  
43 largest biomes on the planet, ranging from 15-23 Pg to perhaps as much as 60 Pg of carbon

44 sequestered in resident microbes (Whitman *et al.*, 1998; McMahon and Parnell, 2013;  
45 Magnabosco *et al.*, 2018; Bar-On *et al.*, 2018; Flemming and Wuertz, 2019). The deep  
46 subsurface biosphere (DSB) found underlying the continents or terrestrial biosphere, has  
47 emerged as a dynamic, populated, metabolically-active environment, affecting carbon storage  
48 and global elemental cycles (Barry *et al.*, 2019; Magnabosco *et al.*, 2018; Flemming and Wuertz,  
49 2019). Although some DSB environments exhibit exceptionally low diversity (Chivian *et al.*,  
50 2008), many of those studied harbor an abundant and diverse microbiome (e.g., Baker *et al.*,  
51 2016; Chivian *et al.*, 2008; Dong *et al.*, 2014; Lau *et al.*, 2014; Magnabosco *et al.*, 2015;  
52 Magnabosco *et al.*, 2018; Nyysönen *et al.*, 2014; Rinke *et al.*, 2013). Furthermore, newly  
53 identified subsurface microbial lineages are continually and commonly implicated in major  
54 geochemical cycles, highlighting the importance of uncultivated groups in understanding those  
55 cycles (Baker *et al.*, 2016; Rasigraf *et al.*, 2014). However, the vast, difficult to access, and  
56 heterogeneous nature of the terrestrial DSB complicate efforts to study microbially mediated  
57 processes therein. Further confounding our understanding of these processes is the growing  
58 appreciation that a high proportion of subsurface microbes have yet to be cultured, known only  
59 by culture-independent genetic evidence and colloquially referred to as ‘microbial dark matter’  
60 (Castelle *et al.*, 2015; Momper *et al.*, 2017; Rinke *et al.*, 2013; Wrighton *et al.*, 2012).

61         Microbial observatories are portals into the deep subsurface established to monitor  
62 subsurface geochemistry and microbial ecology across the world, including in Sweden, Finland,  
63 Canada, Switzerland, and the United States (Cardace *et al.*, 2013; Osburn *et al.*, 2019; Pedersen,  
64 1996; Pedersen *et al.*, 2014; Stroes-Gascoyne *et al.*, 2007). The advent of high-throughput  
65 shotgun DNA sequencing methods was a pivotal technological advance towards understanding

66 the microbial diversity of the deep terrestrial subsurface, reducing primer bias and capturing the  
67 full breadth of *in situ* diversity. Recent applications of these techniques have revealed that  
68 shallow and deep subsurface environments harbor a vast diversity of subsurface taxa particularly  
69 in uncultivated, candidate, groups and that spatial separation of taxa occurs with depth and  
70 between aquifers (Anantharaman *et al.*, 2016; Jungbluth *et al.*, 2016; Probst *et al.*, 2017;  
71 Momper *et al.*, 2017a; Momper *et al.*, 2017b; Probst *et al.*, 2018). Key genomic adaptations  
72 discovered within deep intraterrestrials include widespread capacity to fix carbon, particularly  
73 with the Wood Lungdal pathway (Lau *et al.*, 2016; Magnabosco *et al.*, 2016; Momper *et al.*,  
74 2017) and a dichotomy of small, ultra-streamlined genomes and larger, bulky genomes with  
75 diverse metabolic capabilities (Anantharaman *et al.*, 2016; Jungbluth *et al.*, 2016; Jungbluth *et*  
76 *al.*, 2017; Lau *et al.*, 2016). Current comprehensive reviews of microbial life on and within Earth  
77 integrate information from these vast sequencing datasets, estimate the diversity and abundance  
78 of the DSB as a whole, and further underscore subsurface microbes' impact on global  
79 biogeochemical processes (Flemming and Wuertz, 2019; Magnabosco *et al.*, 2018). However, to  
80 date these datasets are heavily focused on shallow subsurface realms, or individual locations  
81 within a single very deep site, often without geochemical context, leaving a gap in the range of  
82 depths and environments for which we have a clear genomic and metabolic understanding.

83 In this study we use whole metagenome sequencing methods to investigate microbes  
84 from the Deep Mine Microbial Observatory- DeMMO- (Osburn *et al.*, 2019) located in the  
85 Sanford Underground Research Facility (SURF) in Lead, South Dakota, USA. We draw on a  
86 four-year geochemical and 16S rRNA tag sequencing dataset collected at DeMMO (Osburn *et*  
87 *al.*, 2019, 2020) to integrate microbial, geochemical, and geological observations to expand our  
88 genomic interpretation to subsurface microbial processes. Notably, within this metagenomic

89 dataset, we have near complete metagenome assembled genomes (MAGs) from a rich array of  
90 previously uncultured bacteria. We analyze these MAGs to query and characterize metabolic  
91 capabilities of microbial communities at DeMMO and use phylogeny of binned MAGs to tie  
92 those metabolic capabilities to responsible taxa. We focus our analysis on MAGs from  
93 uncultivated groups, especially those for which ours are the most complete genomes to date, as  
94 this is the primary mechanism to understand the metabolic role of microbial dark matter (MDM)  
95 in the terrestrial DSB.

## 96 **MATERIALS AND METHODS**

### 97 *Field sampling*

98 All samples for sequencing and corresponding geochemical data were collected from  
99 DeMMO borehole fluids and controls (mine service water used for lubricant during borehole  
100 drilling and an overlying freshwater stream – Whitewood Creek) between April 16-19, 2018.  
101 Microbial cells were filtered from 10 L of fluid onto 47 mm, 0.1  $\mu\text{m}$  Supor filters (Pall  
102 Corporation, Port Washington, NY, USA), frozen immediately on dry ice and stored frozen at -  
103 80°C. Detailed descriptions of the host geology, borehole characteristics, the establishment of the  
104 DeMMO, and methods for geochemical analyses can be found in Osburn et al. (2014) and  
105 Osburn et al. (2019). Physical and geochemical characteristics of fluids at the time of sampling  
106 are provided in Table 1.

### 107 *DNA extraction and sequencing*

108 Whole genomic DNA was extracted using a modified phenol-chloroform method with  
109 ethanol precipitation as described in Osburn et al. (2014). Library preparation, pooling, quality

110 control and sequencing were performed at the Environmental Sample Preparation and  
111 Sequencing Facility at Argonne National Laboratory, Lemont, IL, USA. Sequencing was  
112 performed on an Illumina HiSeq2500 platform, resulting in ~150 bp paired end reads.

113 *De novo assembly, read mapping and generation of metagenome assembled genomes*

114 Trimming of paired end reads was performed using Trimmomatic 0.36 with default  
115 parameters and a minimum sequence length of 36 base pairs (Bolger et al, 2014). Reads were  
116 assembled using the MEGAHIT assembly algorithm (Li et al., 2015) with a 1,000 bp minimum  
117 contig length. Coverage depth information was then generated for scaffolds greater than 1,000  
118 base pairs by mapping the 150 base pair paired-end reads of each sample to its respective  
119 assembly using the Burrows-Wheeler Alignment tool, BWA version 0.7.15 (Li and Durbin,  
120 2009) with the BWA default parameters. SAMtools v0.1.17 (Li et al, 2009) was then used to  
121 convert files to binary format for downstream analysis.

122 Metagenome assembled genomes (MAGs) were generated using MetaBAT2, which relies  
123 on sequence composition, differential coverage and read-pair linkage (Kang et al., 2019). MAG  
124 completeness (reported as percentage of the set of single copy marker genes present) and  
125 contamination (calculated as multiple occurrences of a single copy marker gene) were calculated  
126 using the “lineage\_wf” workflow in the CheckM pipeline (Parks et al, 2015). MAGs that  
127 contained >10% contaminating single copy genes were manually refined and curated using the  
128 Anvi’o program (Eren et al., 2015). MAG completeness and contamination were subsequently  
129 re-calculated using five different standard marker gene suites (Alneberg et al, 2014; Campbell et  
130 al, 2013; Creevey et al, 2011; Dupont et al, 2012; Wu & Scott, 2012). MAGs with >10%  
131 contamination after curation were removed. Here, we have included all MAGs for which

132 taxonomy could be assigned, even if those with low completeness (14-30%). Lowering the  
133 completeness threshold allowed greater retention of DNA generated from each sample and wider  
134 taxonomic representation. Because our analysis relies on gene presence, not absence, the  
135 inclusion of these less complete MAGs does not compromise our analyses.

### 136 *Assignment of putative taxonomies and ribosomal protein tree construction*

137 MAGs were assigned taxonomic identities first according to their placement in a  
138 phylogenomic tree using the "tree" command in CheckM (Parks et al, 2015) and refined using  
139 the Genome Taxonomy Database and the associated GTDB-Tk toolkit (Chaumeil, et al. 2019;  
140 Parks et al., 2018; Parks et al., 2020 <https://github.com/GenomeTaxonomy/GtdbTk>). A ribosomal  
141 protein tree was generated using GToTree (Lee, 2019) and RAxML (Stamatakis, 2014). MAGs  
142 were queried for the 15 syntenic and phylogenetically informative ribosomal proteins identified  
143 previously (Hug et al., 2016) using HMMER v3.1b1 (Eddy, 2011). If multiple single copy target  
144 genes were identified in a single MAG, that particular gene was excluded from the alignment.  
145 Ribosomal protein sequences were aligned independently using MUSCLE v. 3.8.31 (Edgar,  
146 2004). Automated trimming of alignments was performed with Trimal (Gutierrez et al., 2009)  
147 and individual alignments from a given MAG were concatenated. MAGs were removed from the  
148 final alignment if <40% of the 15 queried ribosomal proteins were identified. 1,673 reference  
149 genomes were downloaded from the NCBI database and processed using the same methods to  
150 produce a concatenated ribosomal protein alignment for each genome. A maximum likelihood  
151 tree generated from this alignment was constructed using RAxML v. 8.2.12 (Stamatakis, 2014)  
152 under the LG plus gamma model of evolution (PROTGAMMALG in the RAxML model  
153 section), with 1000 bootstrap replicates.

154 *Metabolic pathway analysis*

155 Gene calling and metabolic pathway identification in MAGs was performed using  
156 METABOLIC (METabolic And Biogeochemistry anaLyses In miCrobEs) Version 3.0 (Zhou et  
157 al., 2019). METABOLIC uses a combination of KOFAM, Pfam, TIGRFam, MEROPs, dbCan2,  
158 and customized Hidden Markov Models (HMMs) to identify and classify coding sequences. If  
159 >75% of the genes for a given pathway were identified in a single MAG, that pathway was  
160 considered present and ‘complete’, regardless of that MAG’s estimated genome completeness.

161 **RESULTS**

162 *Metagenome assembled genomes and phylogenetic identification*

163 A total of 581 MAGs were recovered from the eight assembled metagenomes. Genome  
164 statistics including MAG ID, NCBI taxon ID, completeness and contamination are listed in  
165 Supplementary Data File 1. Of all these 581, 81 were >90%, 99 were 70-89% and 154 were 50-  
166 69% complete (Fig. 1). Of the less complete genomes (< 50% complete), more than a quarter (56  
167 of 211) belong to the Candidate Phyla Radiation (CPR). This group is known to contain  
168 streamlined genomes often lacking the full suite of ‘essential’ single copy marker genes, and  
169 therefore is not necessarily a reflection of poor assembly (Nelson and Stegen, 2015; Castelle and  
170 Banfield, 2018). Similarly, Whitewood Creek (WC), the stream water control, contained the  
171 greatest proportion of incomplete genomes (~75% were <50% complete) and the highest  
172 proportion of CPR MAGs at 47% (28 MAGs) (Fig. 2a and c).

173 Of the six DeMMO samples, hereafter called D1-D6, the fewest MAGs were recovered  
174 from D1 (25) and the most from D6 (100) (Fig. 1 and Fig. 2). The controls, hereafter referred to  
175 as Service Water (SW) and WC, differ from the DeMMO samples in that 1) they lack Archaea 2)



176 the WC fluid was enriched in the CPR (Fig. 2c) and 3) the SW contained more than twice the  
177 number of Proteobacterial MAGs of any other sample (Fig. 2d). Phylum level taxonomic  
178 assignments for MAGs can be found in Figure 2a, class break down of the Patescibacteria and  
179 Archaea in Figure 2b and 2c, and assignment to the lowest confident taxonomic level in  
180 Supplementary Data File 1. MAGs are spread across the phylogenetic tree (Fig. 3). Notably, this  
181 dataset is enriched in members of the CPR and uncultivated groups (candidate phyla and classes)  
182 compared to groups with cultivated members (Fig. 2 and 3). Currently there are 14 recognized  
183 classes within the Patescibacteria (aka CPR) (Parks et al., 2018), 12 of which are found here  
184 (Fig. 2c). Uncultured and candidate phyla are present in all sites, including controls and DeMMO  
185 boreholes, totaling more than 20 such groups (Fig. 2).

#### 186 *Metabolic capabilities in DeMMO fluids planktonic communities*

187 Our objective in this analysis is to present an overview of the metabolic potential of  
188 DeMMO genomes over the represented spatial and geochemical landscape and to attribute this  
189 potential to specific taxonomic groups. To this end, we present genes for prominent energy  
190 metabolisms at all sites including WC and SW to contrast surface waters to subsurface fluids.  
191 Genes which are diagnostic for a variety of dissimilatory metabolisms were queried in MAGs  
192 and those of most interest are displayed in Fig. 4 (complete gene name, Pfam/TIGRfam are in  
193 Supplementary Data File 2). A complete list of all gene hits for all MAGs is presented in  
194 Supplementary Data File 3.

#### 195 *Nitrogen*

196 Nitrogen is present in many oxidation states (-3 to +5) which are transformed through a  
197 variety of microbially mediated redox reactions. In respiratory denitrification, nitrate ( $\text{NO}_3^-$ ),  
198 nitrite ( $\text{NO}_2^-$ ), nitric oxide (NO) and nitrous oxide ( $\text{N}_2\text{O}$ ) are sequentially reduced to dinitrogen  
199 gas ( $\text{N}_2$ ), with each step catalyzed by one or more metalloenzymes: *nar*, *nir*, *nor* and *nos*  
200 catalyzing each step (Zumft 1997). The potential for nitrate reduction is present all samples, with  
201 the intracellularly (*nar*) mediated reduction being relatively more abundant than the periplasmic  
202 (*nap*) form (Fig. 4). Microbial nitrite reduction ( $\text{NO}_2^-$  to NO) is catalyzed by two related  
203 respiratory periplasmic enzymes: the *nirK*-encoded copper nitrite reductase or the *nirS*-encoded  
204 cytochrome *cd1* (Berks et al., 1995; Brittain et al., 1992; Green et al., 2010). These genes are  
205 relatively scarce compared to those that catalyze nitrate reduction, however they were identified  
206 in all samples with the exception of *nirS* in D3 MAGs (Fig. 4). The metabolic potential for the  
207 final step in denitrification varies across samples as *nosD* was identified in MAGs from D3 and  
208 5, but not D1, D4 of D6 and the canonical marker gene, *nosZ*, was found in D2-D6, but not D1  
209 (Fig. 4). Dissimilatory nitrate reduction to ammonium (DNRA) bacteria use NrfA as their key  
210 enzyme. Assisted by its redox partner NrfH, NrfA catalyzes the six-electron reduction of nitrite  
211 to ammonium (Simon, 2002; Einsle, 2011; Simon and Klotz, 2012). Genes for both subunits are  
212 highly abundant in all DeMMO samples (Fig. 4). The *nxrA* and *nxrB* genes are powerful  
213 functional and phylogenetic markers to detect and identify uncultured nitrite oxidizing bacteria  
214 (Anantharaman et al., 2016; Crane et al., 1995; Daniels et al., 1986) and these genes are most  
215 prominent in D2, with lesser detection in D3, D5 and D6 (Fig. 4).

216 *Sulfur*

217 Sulfur is a versatile element and can be metabolically transformed between eight  
218 oxidation states (-2 to +6). Canonical genes involved in sulfite ( $\text{SO}_2^-$ ), sulfate ( $\text{SO}_4^{3-}$ ) and  
219 thiosulfate ( $\text{S}_2\text{O}_3^{2-}$ ) reduction (*sat*, *asr*, and *phs*, respectively) were queried in all MAGs. *Sat* was  
220 highly abundant across all DeMMO samples, while *phsA* was less common, and the complete set  
221 of *asr* subunits (*A*, *B* and *C*) were identified exclusively in D6 (Fig. 4). Sulfur species can also be  
222 used as electron donors. Genes involved in sulfur oxidation, *sqr* and *sdo*, were identified in all  
223 DeMMO samples and *sdo* was relatively abundant (Fig. 4). SQR is known to be used for sulfide  
224 ( $\text{H}_2\text{S}$ ) detoxification and therefore is not necessarily indicative of dissimilatory processes, but  
225 regardless its presence indicates the potential to transform  $\text{H}_2\text{S}$  to elemental sulfur ( $\text{S}^0$ ) or sulfate  
226 ( $\text{SO}_4^{2-}$ ). Microbially mediated S transformation in the environment can be quite complex as  
227 many enzymes that transform sulfur can use it as a terminal electron acceptor (TEA) or electron  
228 donor, depending on environmental conditions. Among these are dissimilatory sulfite reductase  
229 (*dsr*), adenosine-5'-phosphosulfate (*aprA*) and the Sox gene cluster (*sox*). The *dsr* genes are the  
230 most common across all sites, followed by *aprA*. Sox genes were far less common, most  
231 abundant in D1, but *soxC* was not identified at all in D3 and D6 (Fig. 4). *DsrD*, the small subunit  
232 of dissimilatory sulfite reductase that is essential for sulfate reduction, corresponds to the  
233 abundance of *dsrAB* in D1-D3 and D6, but is slightly less abundant in D4 and D5 (Fig. 4).

## 234 *Hydrogen and Oxygen*

235 Hydrogen gas is present in DeMMO fluids (Osburn et al., 2014; Osburn et al., 2019) and  
236 can be a powerful electron donor in subsurface environments (Nealson et al., 2005; Takai et al.,  
237 2004). We queried a suite of hydrogenases involved in hydrogen-transforming microbial  
238 reactions (Sondergaard et al., 2016). Among those hydrogenases, NiFe groups 1, 3ABD and 3C

239 were identified in all six DeMMO fluids and were the most abundant hydrogenases. FeFe group  
240 B were least abundant, with identification in only D6. FeFe group C2 and NiFe group 4H were  
241 also relatively uncommon, identified only in D3 and D1, respectively. D1 had by far the fewest  
242 number and types of hydrogenases whereas D3 and D6 had the greatest.

243 Aerobic bacteria and archaea use oxygen as their respiratory TEA. Oxygen-respiring  
244 genes are most abundant in the control WC and SW samples, followed closely by D1, and D4  
245 (Figure 4). Cytochrome oxidase (Cox) catalyzes the reduction of oxygen to water and is  
246 therefore essential for aerobic metabolism (Capaldi, 1990; Chan and Li, 1990; Saraste, 1990;  
247 Babcock and Wikstrom, 1992). Subunits *coxA* and *coxB* were found in all eight samples (Figure  
248 4). Another terminal oxidase, the *bo<sub>3</sub>* oxidase (Cyo), was found in four of the eight samples: D1,  
249 D4, WC and SW (Figure 4). In summary, oxygen respiring genes were found in all samples, but  
250 the distribution of specific genes differed between sites.

### 251 *Metals and halogens*

252 Known genes for iron, manganese and selenite reduction, as well as those involved in  
253 halogen cycling, were identified in all samples to varying degrees. Genes indicative of metal  
254 reduction, *mtrB*, *mtrC*, were detected in all DeMMO fluids, relatively most common in D2, but  
255 not detected in WC. Putative selenate reduction genes were found in all samples save WC and  
256 was highest in D5 and D6 (Fig. 4). The canonical gene for chlorite reduction (*cld*) was  
257 particularly abundant in the controls, whereas putative perchlorate reduction (*pcrA* and *pcrB*)  
258 was identified in samples D2-D6, but not controls. The gene implicated in reductive  
259 halogenation (*pceA*), typically associated with members of the phylum Chloroflexi (specifically

260 the *Dehalococcoidia*), was found in D3-D6, with highest abundances in D3 and D6 (Fig. 4)  
261 corresponding to the relative abundance of Chloroflexi.

## 262 *Carbon respiration and fixation*

263 C1 carbon metabolisms were investigated owing to their potential importance to  
264 subsurface metabolism including carbon monoxide (CO), methanol (CH<sub>3</sub>OH), formate (CHO<sub>2</sub><sup>-</sup>),  
265 and formaldehyde (CH<sub>2</sub>O) oxidation. Genes known to be involved in CO oxidation (*coxLMS*)  
266 were abundant in all sites except WC and those used in formate oxidation (*fdhAb, fdoHG, fdwB*)  
267 were abundant across all samples (Fig. 4). Genes responsible for formaldehyde oxidation (*fae,*  
268 *fghA, frmA*) were variable across samples: they were not present in D3 or D6, at low abundance  
269 in D2 and D5, and most abundant in D1, D4 and controls (Fig. 4). Putative methanol oxidation  
270 (*mxmA*) was most abundant in D1, D4, SW and WC, was present but in low abundance in D2 and  
271 D6, and was not identified in D3 (Fig. 4). While an in-depth interrogation of heterotrophic  
272 pathways is beyond the scope of this analysis, genes for fermentation were queried and found in  
273 all fluids, but at noticeably lower abundance in WC, SW and D1 than D2-6.

274 The capability of autotrophic carbon fixation is arguably an important one in carbon  
275 limited deep subsurface environments and is widespread at DeMMO. We detected genes for five  
276 of the six empirically demonstrated carbon fixation pathways (Hugler and Sievert, 2010) across  
277 samples. A list of genes queried, and which carbon fixation mode they are associated with can be  
278 found in Supplementary Data File 4. As illustrated in Fig. 5, genes indicative of the 3-  
279 hydroxypropionate bicycle were identified in MAGs from all 8 fluids. MAGs in D6 contained a  
280 relatively high abundance of *abfD*, a key gene in the 3-Hydroxypropionate/4-Hydroxybutyrate

281 CO<sub>2</sub> fixation cycle, but it was less common in other DeMMO fluids, and absent from WC and  
282 SW (Fig. 5). RuBisCO, which catalyzes the carboxylation and oxygenation of ribulose 1,5-  
283 bisphosphate (Tabita et al., 2008) was found at quite low abundances in all fluids, as were *aclA*  
284 and *aclB*, key genes in the reverse TCA cycle (Fig. 5). Importantly, genes for the Wood  
285 Ljungdahl pathway (*cooS*, *cdhE*, *cdhD*) were the most abundant in DeMMO fluids when  
286 compared to the other four CO<sub>2</sub> fixation cycles queried, but were not detected in the controls,  
287 SW and WC (Fig. 5).

## 288 **DISCUSSION**

### 289 *Controls and possible contamination*

290 The control samples, WC and SW, were included in our analysis to assess their overall  
291 taxonomic and metabolic similarities and differences relative to DeMMO subsurface sites. We  
292 found stark differences in high-level taxonomic groups (e.g.- absence of Archaea from control  
293 samples, presence of Cyanobacteria in both control samples but not DeMMO fluids- Fig. 2).  
294 Differences in putative metabolisms between DeMMO and control fluids (e.g.- absence of  
295 hydrogenases and metal reducing genes and relatively high abundance of oxygen respiring genes  
296 in control samples, Fig. 4) were also apparent. In the service water, which is used as lubricant  
297 during boring activities and was used to drill D4-D6 in 2016, we detected a high abundance of  
298 Proteobacteria, compared to the DeMMO fluids. This water originates as municipal water for the  
299 city of Lead, South Dakota and is stored underground in tanks until it is used for lubricant or  
300 other uses in the underground mining facilities. While these are not quantitative measurements of  
301 contamination or lack thereof, these differences combined with analyses from other DeMMO  
302 datasets show that DeMMO fluids are distinct from laboratory controls, surface waters, and

303 service water (Osburn et al., 2019; Casar et al., 2020; Rowe et al., 2020). Indeed, previous 16S  
304 rRNA gene sequencing performed over a 4-year timeseries within the same DeMMO boreholes  
305 demonstrated that the service water has a significantly different microbial community compared  
306 to the DeMMO fluids, and that there is no evidence for cross contamination (Osburn et al.,  
307 2020). Because of qualitative differences observed between sites in this metagenomic dataset and  
308 those shown between controls and DeMMO fluids using 16S rRNA analyses, we are confident  
309 that the trends we describe are not driven by contamination acquired either within the mine  
310 during sampling or during laboratory processing. That said, fluid paths within the subsurface  
311 environment have the potential to exchange microbes. For instance, WC and D1 are likely  
312 hydrologically connected as are D4 and D5 (Osburn et al., 2019) and thus a natural  
313 connection in the microbiology is to be expected. We focus our subsequent discussion  
314 specifically on the bacterial groups from the DeMMO subsurface fluids.

### 315 *Overall metabolic capabilities in DeMMO subsurface fluids*

316 One key question regarding the microbial ecology of the deep terrestrial subsurface is  
317 that of geochemical cycling of labile elements (e.g.- carbon, iron, nitrogen, sulfur), and how  
318 subsurface microbes interact with those elements in their bioavailable forms (considering both  
319 assimilatory and dissimilatory processes). With increasing access to paired geochemical and  
320 biological (both DNA and RNA) information from subsurface environments around the globe,  
321 we can begin to understand the scope of subsurface microbial biogeochemical cycling. Although  
322 we cannot determine the microbial processes that are occurring with metagenomes, we can make  
323 predictions about what processes the DBS community is capable of at the DeMMO locations that  
324 vary geologically, geochemically, and spatially.

325 *Metabolic capabilities by taxonomic group*

326           One significant benefit to binning MAGs from metagenomic data is that metabolic  
327 pathways can be linked to discrete genome bins with accompanying taxonomy. Here we discuss  
328 a suite of 27 potential metabolic reactions (Supplementary Data File 5) and tie them to specific  
329 cultivated and uncultivated phyla (Fig. 6, Supplementary Figs. 1-15). In the following Results  
330 and Discussion we will refer to MAGs with the notation ‘SAMPLE\_#,’ indicating the fluid  
331 sample from which they were reconstructed and the numerical rank of that MAG’s relative  
332 completeness among all MAGs from that single sample.

333 *Predicted metabolic capabilities of common cultivated phyla*

334           Members of cultivated phyla likely play key roles in subsurface biogeochemical cycling  
335 at DeMMO. Members of the Proteobacteria have broad metabolic capabilities, mediating 25 of  
336 the 27 reactions that were queried, with the exception of methanogenesis (# 6) and sulfite  
337 reduction (# 27) (Supplementary Figs. 1-3). Nitrospira MAGs also have broad metabolic  
338 potential including for heterotrophy, nitrogen and sulfur metabolisms, but also metal reduction  
339 and hydrogen oxidation (Fig. 6, Supplementary Fig. 4). These observations are consistent with  
340 what is known from cultivated Nitrospira (Daims and Wagner, 2018).

341           Members of the Firmicutes have been found in global subsurface environments and often  
342 increase in abundance with depth and play key roles in S-cycling (Baker et al., 2003; Cowen et  
343 al., 2003; Chivian et al., 2008; Aüllo et al., 2013; Tiago and Veríssimo, 2013; Magnabosco et al.,  
344 2015; Jungbluth et al., 2016). Firmicutes (including the newly delineated Firmicutes groups B, D  
345 and E) are quite common in D6 (15 MAGs), and four MAGs each from Firmicutes group E and



346 B were reconstructed from D3 and D5, respectively (Figure 2). Firmicutes in D6 have a wide  
347 array of potential metabolisms, including methanotrophy (#5), carbon fixation (#4), hydrogen  
348 generation (#19) and selenate reduction (#16) (Supplementary Figs. 5-7). Although there are  
349 only four Firmicutes group B MAGs identified in D5, they appear capable of diverse  
350 metabolisms involving all elements queried (carbon, hydrogen, nitrogen, oxygen, sulfur, metals)  
351 except for those dissimilatory metabolisms involving nitrogen species (Supplementary Fig. 6).

352 MAGs from the recently cultivated phylum Elusimicrobia (Geissinger et al., 2009) were  
353 identified in D3-D6 fluids. The MAG in D3 (DeMMO3\_73) may be capable of fermentation  
354 and/or coupling carbon oxidation to selenate or arsenate reduction. Putative Elusimicrobia in D5  
355 (DeMMO5\_39 and \_42) may be active in carbon and nitrogen cycling in those fluids, possibly  
356 capable of carbon fixation, simple carbon compound oxidation with selenate reduction, and  
357 possibly nitrite ammonification (#11). The single Elusimicrobia genome reconstructed from D6  
358 fluids appears to be quite metabolically diverse although incomplete (50.0%/0.6%  
359 completeness/contamination) containing genes for reactions involving all elements of interest,  
360 save those involving hydrogen generation (#19) or oxidation (#18) (Supplementary Fig. 8).

### 361 *Predicted metabolic capabilities of uncultivated bacterial phyla*

362 This dataset contains a wealth of MAGs from uncultivated bacterial groups. The ability to  
363 assign metabolic processes to members the candidate phyla is particularly powerful as it is one of  
364 the few sources of information on these abundant and under characterized organisms. This  
365 information can further assist in metagenome informed, targeted culturing of novel groups,  
366 adding to its value. For example, OLB16 is a recently named bacterial phylum, for which there

367 are only two publicly available genomes (<https://gtdb.ecogenomic.org/searches?s=al&q=OLB16>,  
368 accessed October 10, 2020). One of these genomes was recovered from D6 fluids in a 2017 study  
369 (Momper et al., 2017). In this previous study we predicted that OLB16 (SURF\_12) may be  
370 capable of nitrate reduction, sulfite oxidation, methane oxidation, and carbon fixation via the  
371 Wood Ljungdahl pathway (Momper et al., 2017). Here, we reconstructed two more OLB16  
372 MAGs in D3 and D6 fluids (DeMMO3\_89, DeMMO6\_4). These new MAGs appear capable of  
373 sulfur oxidation and/or reduction (#21-23), heterotrophy (#1), fermentation, and metal reduction  
374 (#17). The more complete MAG in D6 also appears to transform hydrogen (#18, #19)  
375 (Supplementary Fig. 19), indicating a wide repertoire of potential metabolisms for this newly  
376 identified candidate phylum.

377 Additional newly identified phyla (Parks et al., 2017) were found in DeMMO fluids:  
378 UBA 9089, UBA3054, and UBA10199. The uncultivated phylum UBA9089 was identified in  
379 D1 and D3-D5 (Figure 2). Among those MAGs, sulfur and carbon cycling metabolisms are  
380 ubiquitous, with MAGs in D1, D4 and D5 potentially capable of selenate reduction (#16) and  
381 perhaps even capable of carbon fixation (#4) (Supplementary Fig. 10). UBA3054 (Parks et al.,  
382 2017), was identified in D6 fluids (DeMMO6\_5). Currently there are only three publicly  
383 available genomes from this newly identified phylum, of which DeMMO6\_5 is by far the most  
384 complete (other available MAGs are ~54-58% compared to ~99% complete). This MAG  
385 contains genes capable of heterotrophy (#1), fermentation (#3), arsenate reduction (#14),  
386 elemental sulfur oxidation (#21) and hydrogen generation (#19) (Supplementary Fig. 12).  
387 UBA10199 was found almost exclusively in D2 fluids (DeMMO2\_63 and \_70) with one MAG  
388 recovered from D3. These MAGs appear capable of heterotrophy (#1-3) and elemental sulfur  
389 (#21) and thiosulfate oxidation (#25) (Supplementary Fig. 12). The phylum UBP1, first reported  
18

390 in 2017 (Parks et al., 2017), was found in D5-6 (DeMMO5\_30, DeMMO6\_31). Metabolic  
391 reconstruction indicates that members of this phylum have diverse metabolic capabilities,  
392 potentially mediating sulfur reduction and/or oxidation (reactions #21-23), nitric oxide reduction  
393 (#10), and ammonification (#11) (Supplementary Fig. 13).

394 A single MAG from the candidate phylum Latescibacteria, formerly known as WS3, was  
395 found in D2 fluids (DeMMO2\_58). Despite its relative incompleteness (~48% complete), this  
396 MAG contains diverse metabolic potential with genes involved in 16 of the 27 reactions queried,  
397 most notably for H<sub>2</sub> generation and oxidation and metal reduction (reactions #17-19)  
398 (Supplementary Fig. 14). Two MAGs from the recently designated candidate phylum  
399 Margulisbacteria (formerly candidate division ZB3) were found in D3 (DeMMO3\_43 and \_47).  
400 These appear to be capable of elemental sulfur and carbon oxidation coupled to arsenate  
401 reduction (#14) and potentially fermentation (Supplementary Fig. 15). Establishment of  
402 fermentation and hydrogen dependent metabolisms in this candidate phylum have been well  
403 documented (Carnevali et al., 2019; Utami et al., 2019), potential sulfur oxidation and arsenate  
404 reduction have not been reported, and may point to a differing ecological niche, due to the  
405 differing metabolic role for these new MAGs.

#### 406 *Carbon fixation in DeMMO subsurface fluids*

407 Although photosynthetically derived organic carbon does infiltrate into Earth's  
408 subsurface, it is often recalcitrant and at very low concentrations (Pedersen, 2000). Dissolved  
409 organic carbon (DOC) concentrations at DeMMO sites are very low (generally <1 mg/L)  
410 (Osburn et al., 2019). As this DOC is limited and potentially of low quality, autotrophic carbon

411 fixation may be a key metabolic adaptation, especially in the deeper, older DeMMO fluids. Quite  
412 telling is the fact that genes involved in the Wood Ljungdahl pathway were by far most abundant  
413 across all six DeMMO fluids yet not detected in the controls (Figure 5). This trend is supported  
414 by the geochemical conditions in these fluids (Table 1). At the time of sampling, the oxidation  
415 reduction potential in DeMMO fluids ranged from -61 to -198 mV, indicating little to no oxygen  
416 present. The Wood Ljungdahl pathway requires anoxic conditions, as some of its enzymes,  
417 especially the crucial acetyl-CoA synthase, are highly oxygen sensitive (Berg, 2011). In contrast,  
418 the SW and WC fluids are at near oxygen saturation (~300 mV, data not shown), making it  
419 highly unlikely this form of carbon fixation could be performed. The Wood Ljungdahl pathway  
420 has previously been hypothesized to be a crucial source of primary production in D6 (Momper et  
421 al., 2017) and other deep terrestrial subsurface environments (Magnabosco et al, 2015), a  
422 conclusion supported by this study. Similarly, it follows that RuBisCo, the key enzyme which  
423 catalyzes the carboxylation and oxygenation of ribulose 1,5-bisphosphate (Tabita et al., 2008)  
424 was not common in the dark and reducing fluids of DeMMO (Figure 6). Other trends in carbon  
425 fixation gene presence are not as straightforward. For example, the 3-hydroxypropionate bi-cycle  
426 is commonly used by members of the Chloroflexi (Hügler and Sievert, 2010), yet the fluids with  
427 the greatest number of Chloroflexi MAGs (D6) do not have the greatest proportion of identified  
428 canonical *prpE* genes. Along the same vein, the 3-Hydroxypropionate/4-Hydroxybutyrate mode  
429 of carbon fixation is typically associated with the archaea (Berg et al., 2007; Loder et al., 2016),  
430 yet in this study we find the highest proportion of *abfD* genes in MAGs from D6 (Figure 6),  
431 fluids from which we did not construct archaeal MAGs (Figure 2).

432 *Tying metabolisms to in situ geochemistry*

433 Combining geochemistry with microbiology is challenging in any environmental setting,  
434 but is especially demanding in deep, difficult to access, subsurface environments. Monitoring at  
435 the DeMMO observatory has enabled a rare opportunity to combine 16S rRNA tag sequencing,  
436 whole metagenomic DNA sequencing and assemblies, and geochemical analyses over a multi-  
437 year period. Other terrestrial subsurface studies have combined geochemical analyses with  
438 extensive metagenomic datasets to gain insight into elemental cycling, microbial community  
439 connectedness and microbial metabolic ‘handoffs’ (Anantharaman et al., 2016; Lau et al., 2014;  
440 Magnabosco et al., 2016). These studies found that deep (> 1 km) subsurface communities tend  
441 to rely heavily on the Wood Ljungdahl pathway for potential carbon fixation and primary  
442 production (Magnabosco et al., 2016) and that some subsurface habitats seem to preserve  
443 ancestral gene signatures in biogeochemically relevant functional genes (Lau et al., 2014).

444 In general terms, the distribution of metabolically functional genes identified in this  
445 MAG dataset agree well with our understanding of *in situ* geochemical conditions at DeMMO.  
446 As detailed in the results, we find broad metabolic potential for biogeochemical cycling across  
447 the DeMMO sites, but variation both between sites. For example, sulfate and nitrate are available  
448 TEAs in all fluids, and sulfur and nitrogen cycling genes are abundant across all DeMMO  
449 samples (Table 1 and Fig. 4), particularly those sites where there are abundant forms of N and S  
450 (D4, D5). Along these same lines, hydrogenases were identified in abundance in D2-6, but were  
451 far less abundant in D1, the DeMMO borehole with the lowest average dissolved hydrogen  
452 concentration, and were nearly or completely absent from MAGs binned from the oxic control  
453 samples (Table 1 and Fig. 4).

454           However, deeper examination of the MAGs in this DeMMO dataset revealed a number of  
455 instances where the most abundant functional genes in a given site were not consistent with the  
456 most abundant geochemical species at the time of DNA collection 2018, or in previous sampling  
457 campaigns over the last 4 years. For example, D4 has historically extremely low dissolved  
458 oxygen levels (~0.03 mg/L) and during sampling in 2018 the measured ORP was -200 mV,  
459 however, we identified a wide variety and relatively large abundance of oxygen respiring genes  
460 in D4 MAGs (Table 1 and Fig. 4). It is therefore not clear where these organisms are acquiring  
461 the oxygen necessary for aerobic respiration. In terms of carbon metabolisms, genes involved in  
462 C1 metabolism and fermentation have varying patterns across all DeMMO fluids, but are quite  
463 abundant in all samples (Fig. 4). But dissolved organic carbon levels are quite low in all fluids  
464 (<0.5 and <3.0e<sup>-6</sup> mg/L, respectively).

465           In general, the average gene count for MAGs recovered from DeMMO boreholes was not  
466 small, at ~1,900-2,400 genes per MAG, with typical larger genomes containing ~4,000-6,000  
467 genes (Supplementary Data File 6). This leads us to question why deep subsurface microbes  
468 would retain genes and entire functional pathways when the geochemical substrate for that  
469 metabolism is not present or present at such low concentrations that the reaction is not  
470 energetically favorable. We hypothesize that microbes in this deep subsurface environment gain  
471 a competitive edge by maintaining a wide variety of functional pathways. Indeed, in this study  
472 we identified diverse putative metabolisms in MAGs from little-studied groups such as the  
473 Elusimicrobia and candidate phyla such as OLB16. Our findings indicate that the capability to  
474 perform many dissimilatory energy metabolisms is the norm rather than the exception in non-  
475 CPR MAGs in this deep subsurface environment. Other groups have reported similar findings in  
476 shallow and deep subsurface environments. Large, robust genomes were found in anoxic/near-  
22

477 anoxic and TEA-limited shallow aquifer environments (Anantharaman et al., 2016). When  
478 electron acceptors such as oxygen and nitrate were injected into these aquifers, there was an  
479 almost instantaneous draw down of those substrates, and they were again near detection limit  
480 within hours (Anantharaman et al., 2016). Similarly, the deep subsurface isolate *Desulforudis*  
481 *audaxviator* contains the genomic potential for an astonishing array of catabolic and anabolic  
482 metabolisms including sulfate reduction, carbon and nitrogen fixation, heterotrophy, and others  
483 (Chivian et al., 2008). Our findings support the growing body of evidence that in many  
484 subsurface biomes there is a dichotomy of small, ultra-streamlined genomes and larger, bulky  
485 genomes with diverse metabolic capabilities (Anantharaman et al., 2016; Jungbluth et al., 2016;  
486 Jungbluth et al., 2017; Lau *et al.*, 2016).

487         With time series data (Osburn et al., 2019), long term *in situ* experiments (Casar et al.,  
488 2020) and metagenomic surveys (Momper et al., 2017, this study) we are beginning to piece  
489 together how planktonic and attached microbial communities vary temporally and interact with  
490 and influence *in situ* geology and geochemistry in a deep terrestrial subsurface environment,  
491 DeMMO. In addition to long-term, incremental understanding about terrestrial subsurface  
492 processes, metagenomic studies such as these can significantly augment our understanding of  
493 novel microbial groups and their role in these environments. This understanding enables deeper  
494 questions, such as what percentage of elemental cycling can be attributed to biotic vs abiotic  
495 processes, and on what timescales these processes occur for the whole of the DSB and for  
496 environments that may be of particular interest. While no two subsurface sites are the same, there  
497 are commonalities including an enrichment of Firmicutes, uncultured candidate phyla, and  
498 abundant members of the CPR. Metabolically these groups have the potential for widespread

499 carbon utilization and fixation, sulfur and metal-based metabolisms, and potential roles in rapid  
500 drawdown of injected TEAs such as nitrate and oxygen.

## 501 **CONCLUSIONS**

502 A pillar of advancing environmental microbiology rests on culture independent methods  
503 to assessment of metabolic potential of microbes. Here we present nearly 600 high quality  
504 MAGs deriving from an established transect through the subsurface, from the surface to 1.5 km  
505 deep into the crust. This dataset includes a diversity of taxonomic groups including those from  
506 well-cultivated but metabolically important lineages like the Proteobacteria and Nitrospira, as  
507 well as from virtually unknown taxa known only from a small number of assembled genomes. In  
508 these genomes we find the genetic potential to mediate a range of environmentally important  
509 metabolisms including nitrogen, sulfur, and metal cycling as well as C1-metabolisms,  
510 fermentation, and carbon fixation. The spatial distribution of this metabolic potential often agrees  
511 well with available chemical species, but there are intriguing instances of disagreement which  
512 suggest that maintaining genomic plasticity is a key adaptive strategy of many intraterrestrial  
513 microbes. This work fits into a growing body of work at DeMMO which facilitates integrated  
514 understanding of the deep subsurface biosphere in space, through time, and in chemical and  
515 environmental context. Further, these genomes add to and expand the growing body of  
516 subsurface genomes, informing the capabilities of novel taxa and expanding our ability to  
517 understand this biome on the global scale.

## 518 **DATA DEPOSIT**



519           Sequence data for metagenomic assemblies and their respective MAGs and  
520 corresponding metadata can be accessed using the BioProject identifier PRJNA563685 and  
521 BioSample accessions SAMN18064095, SAMN18064236, SAMN18064310, SAMN18064413,  
522 SAMN18064496, SAMN18064575, SAMN18004502, and SAMN18005272 corresponding to  
523 sites DeMMO1-6, Whitewood Creek, and Service Water communities, respectively. All code  
524 and corresponding data used in this study are available at  
525 [https://github.com/CaitlinCasar/Momper2021\\_DeMMO\\_FractureFluidMetagenomes](https://github.com/CaitlinCasar/Momper2021_DeMMO_FractureFluidMetagenomes).

## 526   **ACKNOWLEDGEMENTS**

527           This work was supported by NASA Exobiology (NNH14ZDA001N) and grants to MRO  
528 from the David and Lucille Packard Foundation and the Canadian Institute for the Advancement  
529 of Research Earth 4D. We would like to recognize Michael D. Lee for helpful conversations on  
530 phylogenomic analyses, phylogenetic tree building and assistance in using GToTree. We also  
531 want to thank the developers of METABOLIC and Karthik Anantharaman for their help in  
532 running and interpreting the data generated using that package. We want to thank especially staff  
533 and personnel at SURF for access to the deep subsurface and repeated access to samples used in  
534 this study and Dr. Brittany Kruger of the Desert Research Institute for coordination of field  
535 sampling expeditions.

## 536   **Conflict of interest**

537           The authors have no conflicts of interest to report.

## 538   **SUPPLEMENTAL INFORMATION**

539           Supplementary information is available at ISMEJ's website

540 **Figure 1. Statistical breakdown of MAG completeness for all 582 genomes across eight**  
541 **samples.**

542 **Figure 2. Taxonomic grouping of all MAGs reconstructed in this study, at the phylum and**  
543 **class levels.** A) Phylum level taxonomic assignments for MAGs in terms of relative abundance  
544 per sample. B) Classes of Archaea identified in fluids. C) MAGs from the Candidate Phyla  
545 Radiation (CPR) identified in this study.

546 **Figure 3. Concatenated ribosomal protein tree containing all MAGs for which at least 40%**  
547 **of target ribosomal proteins could be identified.** Phyla with \*\* (Chlorobi and Ignavibacteria)  
548 have traditionally been considered separate phyla within the FCB superphylum. The GTDBTk  
549 toolkit has included them in the Bacteroidota phylum. We have kept them separate in the  
550 ribosomal protein tree for clarity and because it is not yet widely accepted that they should be  
551 classified in the same phylum.

552 **Figure 4. Functional gene annotations indicative of potential energy-yielding metabolisms**  
553 **in MAGs across all eight fluid samples.** Canonical genes for common electron donors and  
554 acceptors were queried in all MAGs binned from DeMMO fluids and two control samples.

555 **Figure 5. Modes of carbon fixation in MAGs, across all eight fluid samples.** Five of the six  
556 documented modes of carbon fixation are included in this figure, for which we have  
557 deterministic, essential canonical marker genes. Gene abbreviation are listed to the right of the  
558 plot, along with full pathway name. Gene abundance was normalized by number of reconstructed  
559 MAGs for each site individually.

560 **Figure 6. Metabolic chord diagrams for 27 energy yielding metabolic reactions of interest.**  
561 Diagrams are separated by sample and represent the metabolic potential for all MAGs  
562 reconstructed from each respective fluid.

## 563 **References**

564 Alneberg J, Bjarnason BS, de Bruijn I, Schirmer M, Quick J, Ijaz UZ, *et al.* (2014). Binning  
565 metagenomic contigs by coverage and composition. *Nature Methods* 11:1144-1146.

566 Anantharaman K, Brown CT, Hug LA, Sharon I, Castelle CJ, Probst AJ, Thomas BC, Singh A,  
567 Wilkins MJ, Karaoz U, Brodie EL, Williams KH, Hubbard SS, Banfield JF (2016.)  
568 Thousands of microbial genomes shed light on interconnected biogeochemical processes  
569 in an aquifer system. *Nat Commun* 7:13219. doi:10.1038/ncomms13219.

570 Aüllo T, Ranchou-Peyruse A, Ollivier B, Magot M. (2013). *Desulfotomaculum* spp. and related  
571 gram-positive sulfate-reducing bacteria in deep subsurface environments. *Front*  
572 *Microbiol* 4:362.

573 Baker BJ, Moser DP, MacGregor BJ, Fishbain S, Wagner M, Fry NK, *et al.* (2003). Related  
574 assemblages of sulphate-reducing bacteria associated with ultradeep gold mines of South

- 575 Africa and deep basalt aquifers of Washington State. *Environl Microbiol* 5:267-277.
- 576 Baker BJ, Lazar CS, Teske AP, Dick GJ. (2015). Genomic resolution of linkages in carbon,  
577 nitrogen, and sulfur cycling among widespread estuary sediment bacteria. *Microbiome*  
578 3:14.
- 579 Baker BJ, Saw JH, Lind AE, Lazar CS, Hinrichs K-U, Teske AP, Ettema TJ. (2016). Genomic  
580 inference of the metabolism of cosmopolitan subsurface Archaea, Hadesarchaea. *Nature*  
581 *Microbiology* 1:16002.
- 582 Bar-On YM, Phillips R, Milo R. (2018). The biomass distribution on Earth. *PNAS* **115**: 6506–  
583 6511.
- 584 Barry, P.H., Nakagawa, M., Giovannelli, D. *et al.* (2019). Helium, inorganic and organic carbon  
585 isotopes of fluids and gases across the Costa Rica convergent margin. *Sci Data* **6**, 284.  
586 <https://doi.org/10.1038/s41597-019-0302-4>
- 587 Beal EJ, House CJ, Orphan VJ. (2009). Manganese- and iron-dependent marine methane  
588 oxidation. *Science* 325:184–187
- 589 Belay, and B. S. Rajagopal. 1986. Assimilatory reduction of sulfate and sulfite by methanogenic  
590 bacteria. *Appl. Environ. Microbiol.* 51:703-709.
- 591 Berg IA. (2011). Ecological aspects of the distribution of different autotrophic CO<sub>2</sub> fixation  
592 pathways. *Appl Environ Microbiol* 77:1925-1936.
- 593 Berks BC, Ferguson SJ, Moir JW, Richardson DJ (1995). Enzymes and associated electron  
594 transport systems that catalyse the respiratory reduction of nitrogen oxides and  
595 oxyanions. *Biochim Biophys Acta* 1232(3):97-173.
- 596 Bolger AM, Lohse M, Usadel B. (2014). Trimmomatic: a flexible trimmer for Illumina sequence  
597 data. *Bioinformatics* 30:2114-2120.
- 598 Bowers RM, Kyrpides NC, Stepanauskas R, Harmon-Smith M, Schulz F, Doud D, *et al.* (2017).  
599 Genome standards for single amplified genomes and genomes from metagenomes of  
600 Bacteria and Archaea. *Nature Biotechnology* in press.
- 601 Braker G, Tiedje JM (2003). Nitric oxide reductase (*norB*) genes from pure cultures and  
602 environmental samples. *Appl Environ Microb* 69(6):3476-3483.  
603 doi:10.1128/AEM.69.6.3476-3483.2003.
- 604 Brittain T, Blackmore R, Greenwood C, Thomson AJ (1992). Bacterial nitrite-reducing enzymes.  
605 *Eur J Biochem* 209(3):793-802.
- 606 Brown,CT, Hug LA, Thomas BC, Sharon I, Castelle CJ, Singh A., *et al.* (2015). Unusual biology  
607 across a group comprising more than 15% of domain Bacteria. *Nature* 523: 208–211.
- 608 Campbell JH, O’Donoghue P, Campbell AG, Schwientek P, Sczyrba A, Woyke T, *et al.* (2013).  
609 UGA is an additional glycine codon in uncultured SR1 bacteria from the human

- 610 microbiota. *Proc Natl Acad Sci USA* 110:5540-5545.
- 611 Cardace D, Hoehler T, McCollom T, Schrenk M. (2013). Establishment of the coast range  
612 ophiolite microbial observatory (CROMO): drilling objectives and preliminary  
613 outcomes. *Sci. Drill.* 16, 45–55. doi: 10.5194/sd-16-45-2013
- 614
- 615 Castelle CJ, Hug LA, Wrighton KC, Thomas BC, Williams KH, Wu D, *et al.* (2013).  
616 Extraordinary phylogenetic diversity and metabolic versatility in aquifer sediment.  
617 *Nature Communications* 4: 2120.
- 618 Castelle CJ, Wrighton KC, Thomas BC, Hug LA, Brown CT, Wilkins MJ. (2015). Genomic  
619 expansion of domain archaea highlights roles for organisms from new phyla in anaerobic  
620 carbon cycling. *Current Biology* 25:690-701.
- 621 Chaumeil PA, *et al.* 2019. GTDB-Tk: A toolkit to classify genomes with the Genome Taxonomy  
622 Database. *Bioinformatics*, btz848.
- 623 Chen LX, Méndez-García C, Dombrowski N, Servín-Garcidueñas LE, Eloe-Fadrosch EA, Fang  
624 BZ, *et al.* (2017). Metabolic versatility of small archaea Micrarchaeota and  
625 Parvarchaeota. *ISME J* 12:756-775
- 626 Chivian D, Brodie EL, Alm EJ, Culley DE, Dehal PS, DeSantis TZ, *et al.* (2008) Environmental  
627 genomics reveals a single-species ecosystem deep within Earth. *Science* 322: 275–278.
- 628 Cowen JP, Giovannoni SJ, Kenig F, Johnson HP, Butterfield D, Rappé MS, Hutnak M, Lam P.  
629 (2003). Fluids from aging ocean crust that support microbial life. *Science* 299:120-123.
- 630 Crane BR, Siegel LM, Getzoff ED (1995) Sulfite reductase structure at 1.6 Å: evolution and  
631 catalysis for reduction of inorganic anions. *Science* 270(5233):59-67. Daniels, L., N.
- 632 Creevey CJ, Doerks T, Fitzpatrick DA, Raes J, Bork P. (2011). Universally distributed single-  
633 copy genes indicate a constant rate of horizontal transfer. *PLoS One* 6:e22099.
- 634 Daims H, Wagner M. (2018). Nitrospira. *Trends in Microbiol*, 26:462-463.
- 635 Darling AE, Jospin G, Lowe E, Matsen IV FA, Bik HM, Eisen JA. (2014). PhyloSift:  
636 phylogenetic analysis of genomes and metagenomes. *PeerJ* 9:e243.
- 637 Derakshani M, Lukow T, Liesack W. (2001). Novel bacterial lineages at the (sub)division level  
638 as detected by signature nucleotide-targeted recovery of 16S rRNA genes from bulk soil  
639 and rice Grimm F, Franz B, Dahl C. (2008). Thiosulfate and sulfur oxidation in purple  
640 sulfur bacteria. In *Microbial Sulfur Metabolism* (101-116). Springer Berlin Heidelberg.
- 641 roots of flooded rice microcosms. *Appl Environ Microbiol* 67:623–631.
- 642 Dong Y, Kumar CG, Chia N, Kim PJ, Miller PA, Price ND, *et al.* (2014). *Halomonas*  
643 *sulfidaeris*-dominated microbial community inhabits a 1.8 km-deep subsurface  
644 Cambrian Sandstone reservoir. *Environ Microbiol* 16:1695-1708.

- 645 Dunham JP, Friesen ML. (2013). A cost-effective method for high-throughput construction of  
646 Illumina sequencing libraries. *Cold Spring Harbor Protocols*. 9.
- 647 Dupont C, Rusch DB, Yooseph S, Lombardo MJ, Richter RA, Valas R, *et al.* (2012). Genomic  
648 insights to SAR86, an abundant and uncultivated marine bacterial lineage. *ISME J*  
649 6:1186-1199.
- 650 Edwards RA, Rodriguez-Brito B, Wegley L, Haynes M, Breitbart M, Peterson DM, *et al.* (2006).  
651 Using pyrosequencing to shed light on deep mine microbial ecology. *BMC Genomics*,  
652 7:57.
- 653 Eren AM, Esen ÖC, Quince C, Vineis JH, Morrison HG, Sogin ML, Delmont TO. (2015).  
654 Anvi'o: an advanced analysis and visualization platform for 'omics data. *PeerJ*, 3:e1319.
- 655 Farag IF, Youssef NH, Elshahed MS. (2017). Global Distribution Patterns and Pangenomic  
656 Diversity of the Candidate Phylum "Latescibacteria" (WS3). *Applied and Environmental*  
657 *Microbiology*. 10.1128/AEM.00521-17
- 658 Flemming, H.-C. and Wuertz, S. (2019) Bacteria and archaea on Earth and their abundance in  
659 biofilms. *Nat Rev Micro* 1–14.
- 660 Fredrickson JK, Onstott TC. (1996). Microbes deep inside the earth. *Scientific American*,  
661 275:68-73.
- 662 Ghosh W, Dam B. (2009). Biochemistry and molecular biology of lithotrophic sulfur oxidation  
663 by taxonomically and ecologically diverse bacteria and archaea. *FEMS microbiology*  
664 *reviews*, 33:999-1043.
- 665 Geissinger O, Herlemann DPR, Mörschel E, Maier UG, Brune A. (2009). The  
666 Ultramicrobacterium "Elusimicrobium minutum" gen. nov., sp. nov. the First Cultivated  
667 Representative of the Termite Group 1 Phylum. *Applied and Environmental*  
668 *Microbiology* 75:2831-2840
- 669 Gihring TM, Moser DP, Lin LH, Davidson M, Onstott TC, Morgan L, *et al.* (2006). The  
670 distribution of microbial taxa in the subsurface water of the Kalahari Shield, South  
671 Africa. *Geomicrobiology Journal* 23:415–430.
- 672 Green SJ, Prakash O, Gihring TM, Akob DM, Jasrotia P, Jardine PM, Watson DB, Brown SD,  
673 Palumbo AV, Kostka JE (2010) Denitrifying bacteria isolated from terrestrial subsurface  
674 sediments exposed to mixed-waste contamination. *Appl Environ Microbiol* 76(10):3244-  
675 54. doi:10.1128/AEM.03069-09.
- 676 Haveman, S.A. and Pedersen, K. (2002) Distribution of culturable microorganisms in  
677 Fennoscandian Shield groundwater. *FEMS Microbiology Ecology* 39: 129–137.
- 678 Hu P, Tom L, Singh A, Thomas BC, Baker BJ, Piceno YM, *et al.* (2016). Genome-resolved  
679 metagenomic analysis reveals roles for candidate phyla and other microbial community  
680 members in biogeochemical transformations in oil reservoirs. *mBio* 7:e1669-15.

- 681 Hugenholtz P, Pitulle C, Hershberger KL, Pace NR. (1998). Novel division level bacterial  
682 diversity in a Yellowstone hot spring. *Journal of Bacteriology* 180:366-376.
- 683 Hug, L.A., Baker, B.J., Anantharaman, K., Brown, C.T., Probst, A.J., Castelle, C.J., et al. (2016)  
684 A new view of the tree of life. *Nature Microbiology* 1–6.
- 685 Hügler M, Sievert SM. (2011). Beyond the Calvin cycle: autotrophic carbon fixation in the  
686 ocean. *Marine Science* 3:261-289.
- 687 Huntemann M, Ivanova NN, Mavromatis K, Tripp HJ, Paez-Espino D, Palaniappan K, et al.  
688 (2015). The standard operating procedure of the DOE-JGI Microbial Genome Annotation  
689 Pipeline (MGAP v. 4). *Standards in Genomic Sciences* 10:86.
- 690 Hyatt D, LoCascio PF, Hauser LJ, Uberbacher EC. (2012). Gene and translation initiation site  
691 prediction in metagenomic sequences. *Bioinformatics* 28:2223-2230.
- 692 Jumas-Bilak E, Roudière, Marchandin H. (2009). Description of ‘*Synergistetes*’ phyl. nov. and  
693 emended description of the phylum ‘*Deferribacteres*’ and of the family  
694 *Syntrophomonadaceae* phylum ‘*Firmicutes*’. *IJSEM* 59:1028-1035
- 695 Jungbluth SP, Grote J, Lin HT, Cowen JP, Rappé MS. (2013). Microbial diversity within  
696 basement fluids of the sediment-buried Juan de Fuca Ridge flank. *ISME J* 7:161–172.
- 697 Jungbluth SP, Glavina del Rio T, Tringe SG, Stepanauskas R, Rappé MS. (2016) Genomic  
698 comparisons of a bacterial lineage that inhabits both marine and terrestrial deep  
699 subsurface systems. *PeerJ Preprints* 4:e2592v1.
- 700 Kallmeyer J, Pockalny R, Adhikari RR. (2012). Global distribution of microbial abundance and  
701 biomass in seafloor sediment. *Proc Natl Acad Sci USA* 109:16213-16216.
- 702 Kantor RS, Wrighton KC, Handley KM, Sharon I, Hug LA, Castelle CJ, et al. (2013). Small  
703 genomes and sparse metabolisms of sediment-associated bacteria from four candidate  
704 phyla. *MBio* 4:e708-13.
- 705 Karnachuk OV, Lukina PA, Kadinkov VV, Sherbakova, VA, Beletsky AV, Mardanov AV, et al.  
706 (2020). Targeted isolation based on metagenome-assembled genomes reveals a  
707 phylogenetically distinct group of thermophilic spirochetes from deep biosphere. *SFAM*.  
708 10.1111/1462-2920.15218
- 709 Kolinko S, Richter M, Glöckner FO, Brachmann A, Schüler D. (2015). Single-cell genomics of  
710 uncultivated deep-branching magnetotactic bacteria reveals a conserved set of  
711 magnetosome genes. *Environmental Microbiology* 18:21-37.
- 712 Langmead B, Salzberg SL. (2012). Fast gapped-read alignment with Bowtie 2. *Nature Methods*,  
713 9:357-359.
- 714 Lau MCY, Cameron C, Magnabosco C, et al. (2014). Phylogeny and phylogeography of

- 715 functional genes shared among seven terrestrial subsurface metagenomes reveal N-  
716 cycling and microbial evolutionary relationships. *Frontiers in Microbiology*. 5:531.
- 717 Lee KCY, Herbold CW, Dunfield PF, Morgan XC, McDonald IR, Stott MB. (2013).  
718 Phylogenetic Delineation of the Novel Phylum *Armatimonadetes* (Former Candidate  
719 Division OP10) and Definition of Two Novel Candidate Divisions. *ASMJ* 79:2484-2487
- 720 Lin LH, Wang PL, Rumble D, Lippmann-Pipke J, Boice E, Pratt LM, *et al.* (2006). Long-term  
721 sustainability of a high-energy, low-diversity crustal biome. *Science* 314:479–482.
- 722 Lin X, Kennedy D, Fredrickson J, Bjornstad B, Konopka A. (2012). Vertical stratification of  
723 subsurface microbial community composition across geological formations at the  
724 Hanford Site. *Environ Microbiol* 14:414–425.
- 725 Lollar BS, Lacrampe-Couloume G, Slater GF, Ward J, Moser DP, Gihring TM, *et al.* (2006).  
726 Unravelling abiogenic and biogenic sources of methane in the Earth's deep subsurface.  
727 *Chemical Geology*, 22:328-339.
- 728 Lovley DR, and Chapelle FH. (1995). Deep subsurface microbial processes,  
729 *Rev Geophys*, 33:365-381.
- 730
- 731 Loy A, Duller S, Baranyi C, Mußmann M, Ott J, Sharon I, *et al.* (2009). Reverse dissimilatory  
732 sulfite reductase as phylogenetic marker for a subgroup of sulfur-oxidizing  
733 prokaryotes. *Environmental microbiology*, 11:289-299.
- 734 Ludwig W, Strunk O, Westram R, Richter L, Meier H, Buchner A, Brettske I. (2004). ARB: a  
735 software environment for sequence data. *Nucleic Acids Res* 32:1363-1371.
- 736 McMahon S, Parnell J. (2014). Weighing the deep continental biosphere. *FEMS Microbiol Ecol*,  
737 87: 113-120.
- 738 Magnabosco C, Ryan K, Lau MC, Kuloyo O, Lollar BS, Kieft TL, *et al.* (2016). A metagenomic  
739 window into carbon metabolism at 3 km depth in Precambrian continental crust. *ISME J*  
740 10:730-741.
- 741 Matsen FA, Kodner RB, Armbrust EV. (2010). pplacer: linear time maximum-likelihood and  
742 Bayesian phylogenetic placement of sequences onto a fixed reference tree. *BMC*  
743 *bioinformatics*, 11:1-16.
- 744 Markowitz VM, Ivanova NN, Szeto E, Palaniappan K, Chu K, Dalevi D, *et al.* (2008). IMG/M: a  
745 data management and analysis system for metagenomes. *Nucleic Acids Res* 36:534-538.
- 746 Markowitz VM, Chen IM, Chu K, Szeto E, Palaniappan K, Pillay M, *et al.* (2014). IMG/M 4  
747 version of the integrated metagenome comparative analysis system. *Nucleic Acids Res*  
748 42:568-573.
- 749 McMahon, S. and Parnell, J. (2013) Weighing the deep continental biosphere. *FEMS Microbiol.*

- 750 *Ecol.* 87: 113–120.
- 751 Momper LM, Reese BK, Carvalho G, Lee P, Webb EA. (2015). A novel cohabitation between  
752 two diazotrophic cyanobacteria in the oligotrophic ocean. *ISME J* 4:882-893.
- 753 Momper, L., Jungbluth, S.P., Lee, M.D., and Amend, J.P. (2017a) Energy and carbon  
754 metabolisms in a deep terrestrial subsurface fluid microbial community. *ISME J* 11: 2319–  
755 2333.
- 756 Momper, L., Kiel Reese, B., Zinke, L., Wanger, G., Osburn, M.R., Moser, D., and Amend, J.P.  
757 (2017b) Major phylum-level differences between porefluid and host rock bacterial  
758 communities in the terrestrial deep subsurface. *Environmental Microbiology Reports* 9: 501–  
759 511.
- 760 Momper, L., Aronson, H.S., and Amend, J.P. (2018) Genomic Description of “Candidatus  
761 Abyssubacteria,” a Novel Subsurface Lineage Within the Candidate Phylum  
762 Hydrogenedentes. *Frontiers in Microbiology* 9: 1144–11.
- 763 Nancharaiyah YV, Lens PNL. (2015). Ecology and Biotechnology of Selenium-Respiring  
764 Bacteria. *Microbiology and Molecular Biology Reviews*. 10.1128/MMBR.00037-14.
- 765 Nelson, WC, Stegen, JC. (2015). The reduced genomes of Parcubacteria (OD1) contain  
766 signatures of a symbiotic lifestyle. *FMICB* 6:713
- 767 Noha YH, Ibrahim FF, Rinke C, Hallam SJ, Woyke T, Elshahed MS. (2015). In *Silico* Analysis  
768 of the Metabolic Potential and Niche Specialization of Candidate Phylum  
769 “*Latescibacteria*” (WS3). *PLoS ONE* 10(6): e0127499.doi:10.1371/journal.pone.0127499
- 770 Nyssönen M, Hultman J, Ahonen L, Kukkonen I, Paulin L, Laine P, Itävaara M, Auvinen P.  
771 (2014). Taxonomically and functionally diverse microbial communities in deep  
772 crystalline rocks of the Fennoscandian shield. *ISME J*, 8:126-138.
- 773 Onstott TC, Phelps TJ, Colwell FS, Ringelberg D, White DC, Boone DR, *et al.* (1998).  
774 Observations pertaining to the origin and ecology of microorganisms recovered from the  
775 deep subsurface of Taylorsville Basin, Virginia. *Geomicrobiology Journal* 15:353-585.
- 776 Orcutt, BN, Sylvan, JB, Knab, NJ, Edwards, KJ. (2011). Microbial ecology of the dark ocean  
777 above, at, and below the seafloor. *Microbiology and Molecular Biology Reviews*, 75:361-  
778 422.
- 779 Osburn MR, LaRowe DE, Momper L, Amend JP. (2014). Chemolithotrophy in the continental  
780 deep subsurface: Sanford Underground Research Facility (SURF), USA. *Front Extr*  
781 *Microbiol* 5:610.
- 782 Osburn, M.R., Kruger, B., Masterson, A., Casar, C., Amend, J.P., and Amend, J. (2019)  
783 Establishment of the Deep Mine Microbial Observatory (DeMMO), South Dakota, USA, a  
784 Geochemically Stable Portal Into the Deep Subsurface. *Front. Earth Sci.* 7: 1–17.
- 785 Parks DH, Imelfort M, Skennerton CT, Hugenholtz P, Tyson GW. (2015). CheckM: assessing  
786 the quality of microbial genomes recovered from isolates, single cells, and metagenomes.



- 787 *Gen Res* 25:1043-1055.
- 788 Parks D, Rinke C, Chuvochina M, Chaumié PA, Woodcroft B, Evans PN, *et al.* (2017).  
789 Recovery of nearly 8,000 metagenome-assembled genomes substantially expands the tree  
790 of life. *Nature Microbiology*. 2:1533–1542.
- 791 Parks DH, *et al.* 2018. A standardized bacterial taxonomy based on genome phylogeny  
792 substantially revises the tree of life. *Nature*  
793 *Biotechnology*, <http://dx.doi.org/10.1038/nbt.4229>.
- 794 Parks, D.H., *et al.* 2020. A complete domain-to-species taxonomy for Bacteria and  
795 Archaea. *Nature Biotechnology*, <https://doi.org/10.1038/s41587-020-0501-8>.
- 796 Pedersen, K. (1996). 16S rRNA gene diversity of attached and unattached bacteria in boreholes  
797 along the access tunnel to the Äspö hard rock laboratory, Sweden. *FEMS Microbiol.*  
798 *Ecol.* 19, 249–262. doi: 10.1016/0168-6496(96)00017-7
- 799 Pedersen K. (2000). Exploration of deep intraterrestrial microbial life: current perspectives  
800 *FEMS Microbiology Letters*, 185:9-16
- 801 Pedersen, K. (2001) Diversity and activity of microorganisms in deep igneous rock aquifers of  
802 the Fennoscandian Shield. In, Fredrickson, J.K. and Fletcher, M. (eds), *Subsurface*  
803 *Microbiology and Biogeochemistry*. Wiley-Liss, pp. 97–139.
- 804 Peng Y, Leung HC, Yiu SM, Chin FY. (2012). IDBA-UD: a de novo assembler for single-cell  
805 and metagenomic sequencing data with highly uneven depth. *Bioinformatics*, 28:1420-  
806 1428.
- 807 Pfiffner SM, Cantu JM, Smithgall A, Peacock AD, White DC, Moser, DP, *et al.* (2006). Deep  
808 subsurface microbial biomass and community structure in Witwatersrand Basin mines.  
809 *Geomicrobiology Journal*, 23:431-442.
- 810 Pilhofer M, Rappl K, Eckl C, Bauer AP, Ludwig W, Schleifer KH, *et al.* (2008).  
811 Characterization and evolution of cell division and cell wall synthesis genes in the  
812 bacterial phyla *Verrucomicrobia*, *Lentisphaerae*, *Chlamydiae*, and *Planctomycetes* and  
813 phylogenetic comparison with rRNA genes. *J Bacteriol* 190:3192–3202.
- 814 Price MN, Dehal PS, Arkin AP. (2010). FastTree 2—approximately maximum-likelihood trees for  
815 large alignments. *PloS one* 5:e9490.
- 816 Pruesse E, Queast C, Knittel K, Fuchs BM, Ludwig W, Peplies J, Glöckner FO. (2007). SILVA:  
817 a comprehensive online resource for quality checked and aligned ribosomal RNA  
818 sequence data compatible with ARB. *Nucleic Acids Res* 35:7188-7196.
- 819 Pruesse E, Peplies J, Glöckner FO. (2012). SINA: accurate high-throughput multiple sequence  
820 alignment of ribosomal RNA genes. *Bioinformatics*, 28:1823-1829.
- 821 Quast C, Pruesse E, Yilmaz P, Gerken J, Schweer T, Yarza P, *et al.* (2013). The SILVA  
822 ribosomal RNA gene database project: improved data processing and web-based tools.

- 823           *Nucleic Acids Res* 41:590-596.
- 824 Reed AJ, Lutz RA, Vetriani C. (2006). Vertical distribution and diversity of bacteria and archaea  
825           in sulfide and methane-rich cold seep sediments located at the base of the Florida  
826           Escarpment. *Extremophiles* 10:199–211.
- 827 Rinke C, Schwientek P, Sczyrba A, Ivanova NN, Anderson IJ, Cheng JF, *et al.* (2013). Insights  
828           into the phylogeny and coding potential of microbial dark matter. *Nature*, 499:431-437.
- 829 Sander J, Engels-Schwarzlose S, Dahl C. (2006). Importance of the DsrMKJOP complex for  
830           sulfur oxidation in *Allochromatium vinosum* and phylogenetic analysis of related  
831           complexes in other prokaryotes. *Archives of microbiology*, 186:357-366.
- 832 Schauder, R, Preuß, A, Jetten, M, Fuchs, G. (1988). Oxidative and reductive acetyl CoA/carbon  
833           monoxide dehydrogenase pathway in *Desulfobacterium autotrophicum*. *Archives of*  
834           *Microbiology* 151:84-89.
- 835 Seitz KW, Lazar CS, Hinrichs K-U, Teske AP, Baker BJ. (2016). Genomic reconstruction of a  
836           novel, deeply branched sediment archaeal phylum with pathways for acetogenesis and  
837           sulfur reduction. *ISME J* 10:1696–1705.
- 838 Simkus DN, Slater GF, Lollar BS, Wilkie K, Kieft TL, Magnabosco C, *et al.* (2016). Variations  
839           in microbial carbon sources and cycling in the deep continental subsurface. *Geochimica*  
840           *et Cosmochimica Acta* 173:264-283.
- 841 Speth DR, Guerrero-Cruz S, Dutilh BE, Jetten MS. (2016). Genome-based microbial ecology of  
842           anammox granules in a full-scale wastewater treatment system. *Nature Communications*  
843           7:1-10.
- 844 Stamatakis A. (2006). RAxML-VI-HPC: maximum likelihood-based phylogenetic analyses with  
845           thousands of taxa and mixed models. *Bioinformatics* 22:2688-2690.
- 846 Stevens T. (1997) Lithoautotrophy in the subsurface. *FEMS Microbiology Reviews*, 20:327-337.
- 847 Stevens TO, McKinley JP. (1995). Lithoautotrophic microbial ecosystems in deep basalt  
848           aquifers. *Science* 270:450-454.
- 849 Stroes-Gascoyne, S., Schippers, A., Schwyn, B., Poulain, S., Sergeant, C., and Simonoff, M., et  
850           al. (2007). Microbial community analysis of opalinus clay drill core samples from the  
851           mont terri underground research laboratory, Switzerland. *Geomicrobiol. J.* 24, 1–17. doi:  
852           10.1080/01490450601134275
- 853 Tamaki H, Tanaka Y, Matsuzawa H, Muramatsu M, Meng XY, Hanada S, *et al.* (2011).  
854           *Armatimonas rosea* gen. nov., sp. nov., of a novel bacterial phylum, *Armatimonadetes*  
855           phyl. nov., formally called the candidate phylum OP10. *IJSEM* 61:1442-1447
- 856 Tabita FR, Satagopan S, Hanson TE, Kreel NE, Scott SS. (2008). Distinct form I, II, III, and IV  
857           RuBisCo proteins from the three kingdoms of life provide clues about RuBisCo evolution  
858           and structure/function relationships. *Journal of Experimental Botany* 59:1515-1524.

- 859 Tiago I, Veríssimo A. (2013). Microbial and functional diversity of a subterrestrial high pH  
860 groundwater associated to serpentinization. *Environ Microbiol* 15:1687-1706.
- 861 Wagner M, Horn M. (2006). The *Planctomycetes*, *Verrucomicrobia*, *Chlamydiae* and sister phyla  
862 comprise a superphylum with biotechnological and medical relevance. *Curr Opin*  
863 *Biotechnol* 17: 241–249.
- 864 Whitman WB, Coleman DC, Wiebe WJ. (1998). Prokaryotes: the unseen majority. *Proc Natl*  
865 *Acad Sci USA* 95:6578–6583.
- 866 Wrighton KC, Thomas BC, Sharon I, Miller CS, Castelle CJ, VerBerkmoes NC, *et al.* (2012).  
867 Fermentation, Hydrogen, and Sulfur Metabolism in Multiple Uncultivated Bacterial Phyla.  
868 *Science Magazine* 337:1661-1665
- 869 Wu M, Scott AJ. (2012). Phylogenomic analysis of bacterial and archaeal sequences with  
870 AMPHORA2. *Bioinformatics* 28:1033-1034.
- 871 Yarza P, Richter M, Peplies J, Euzéby J, Amann R, Schleifer KH, *et al.* (2008). The All-Species  
872 Living Tree project: A 16S rRNA-based phylogenetic tree of all sequenced type strains.  
873 *Systematic and Applied Microbiology* 31:241-250.
- 874 Youssef NH, Rinke C, Stepanauskas R, Farag I, Woyke T, Elshahed MS (2015a). Insights into  
875 the metabolism, lifestyle and putative evolutionary history of the novel archaeal phylum  
876 'Diapherotrites'. *ISME J* 9:447–460.
- 877 Zumft WG. 1997. Cell biology and molecular basis of denitrification. *Microbiol Mol Biol Rev*  
878 61(4):533–616.

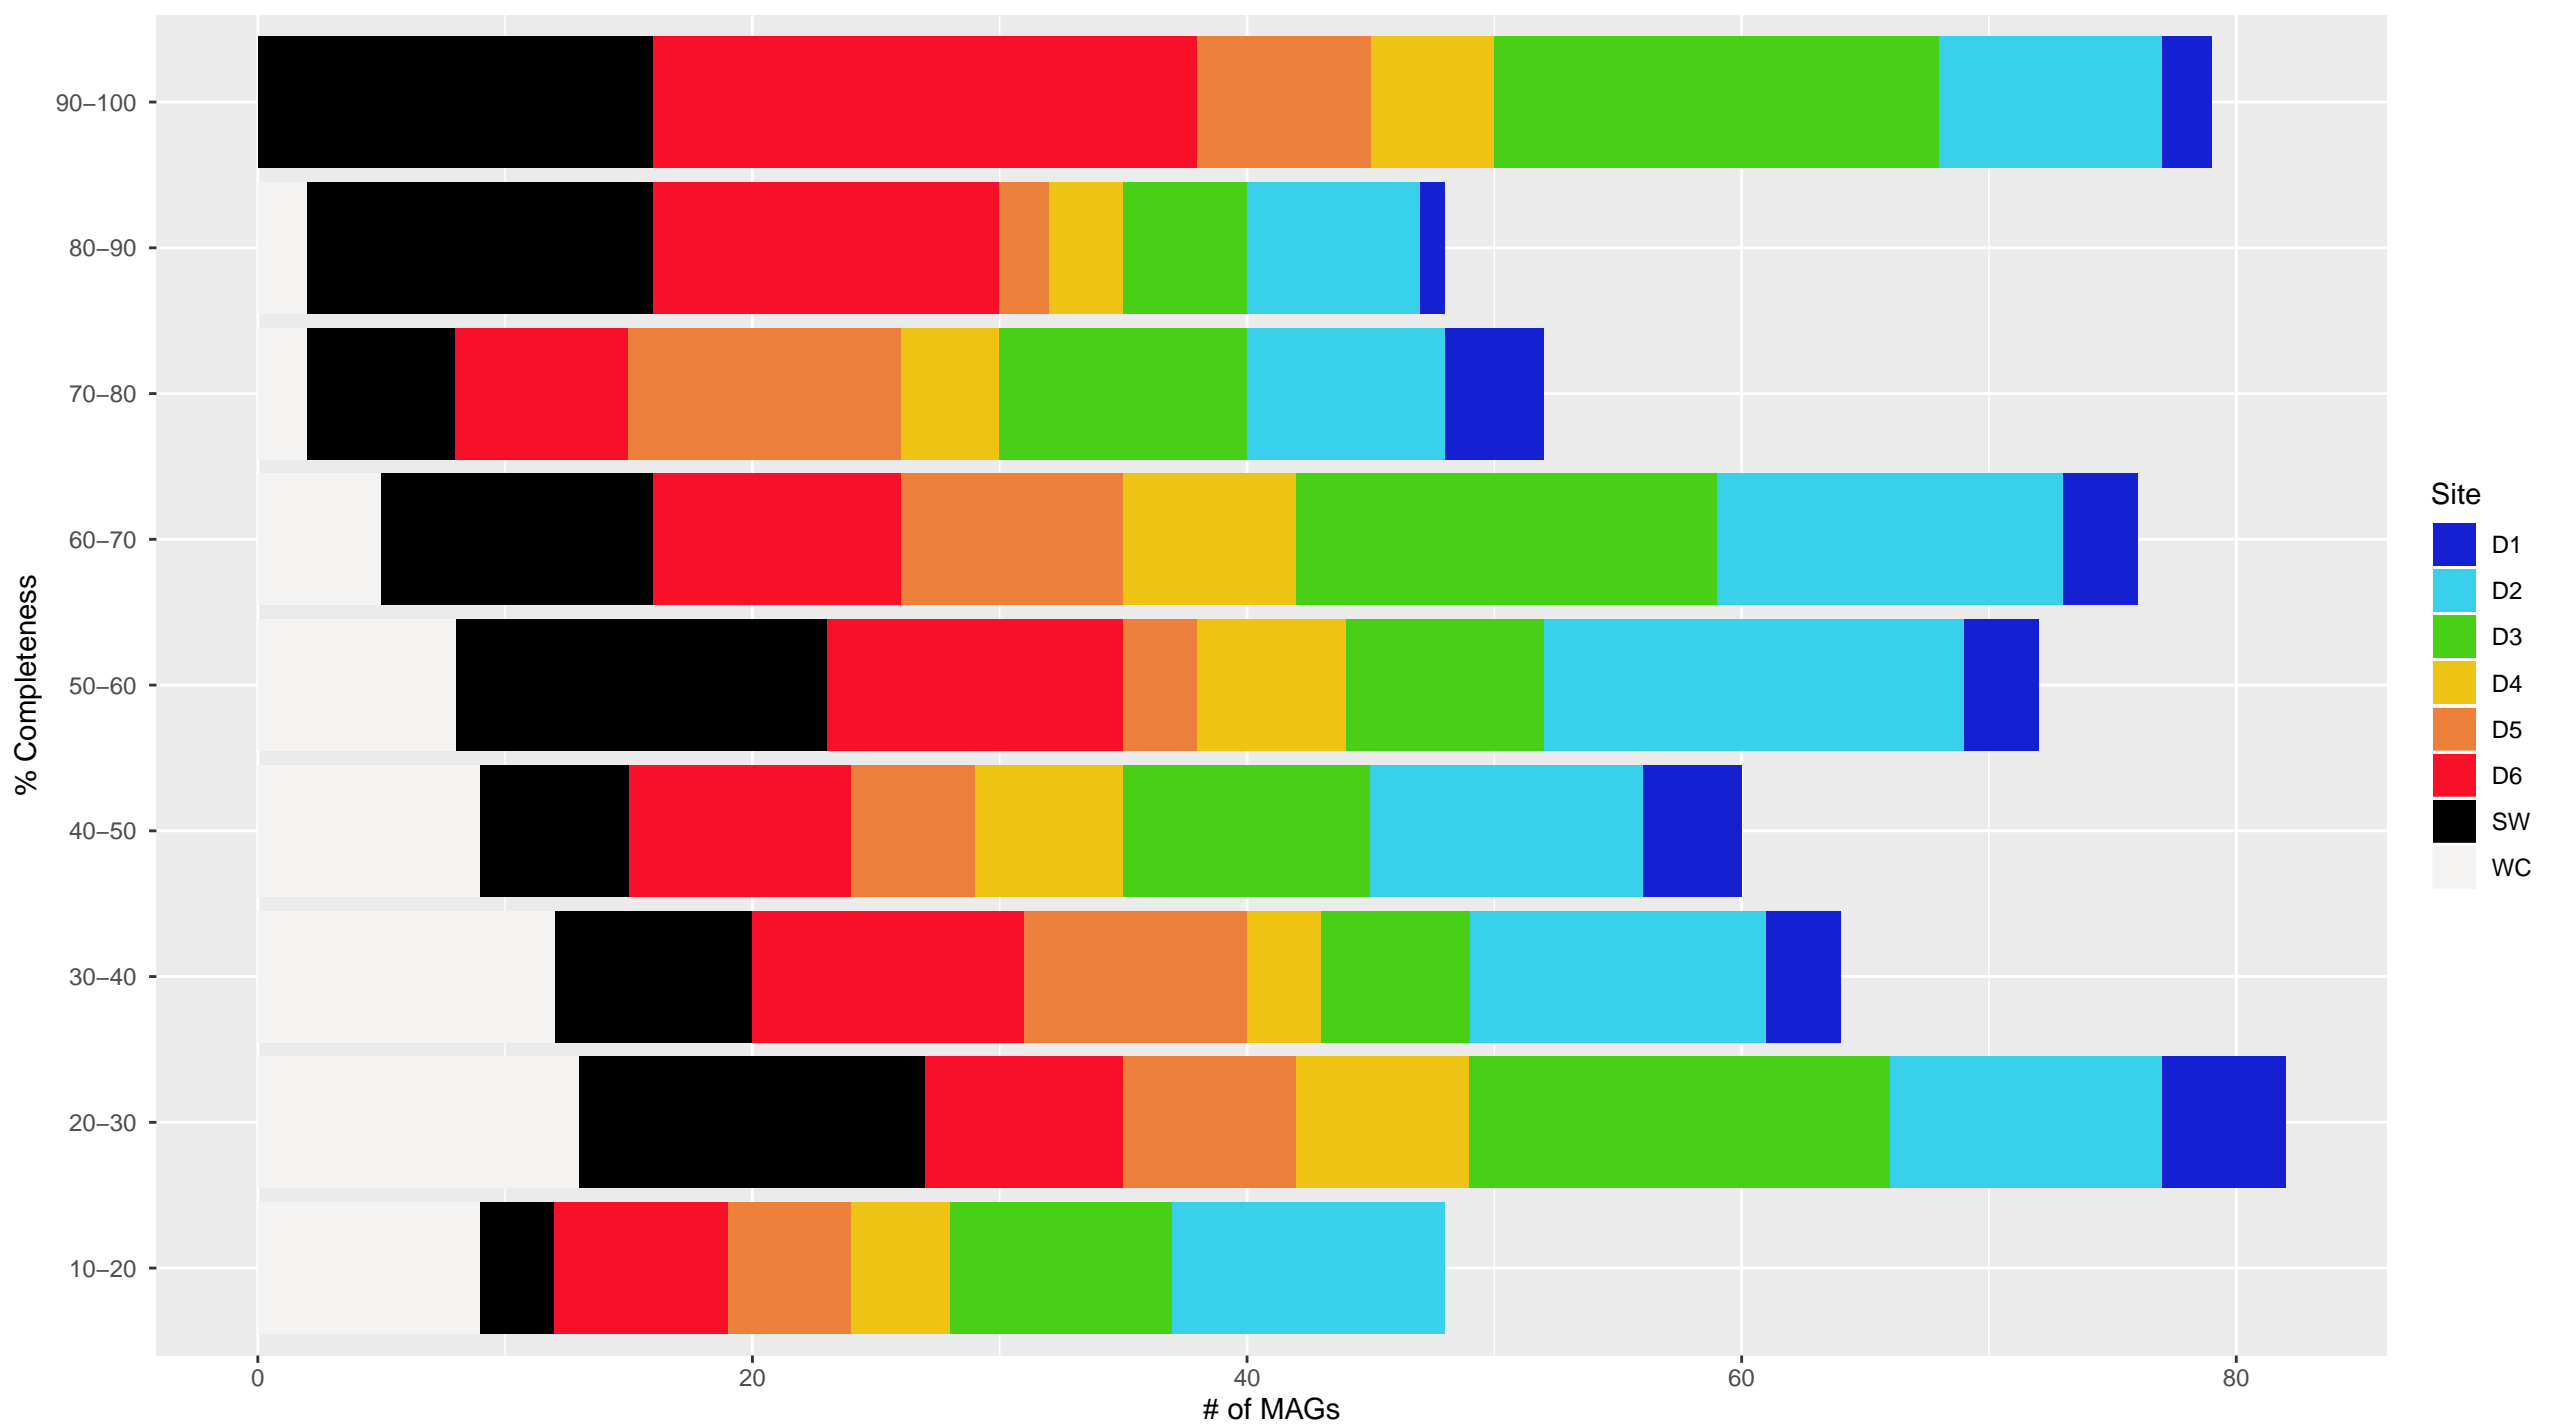

## A. Phylum-level Taxonomy

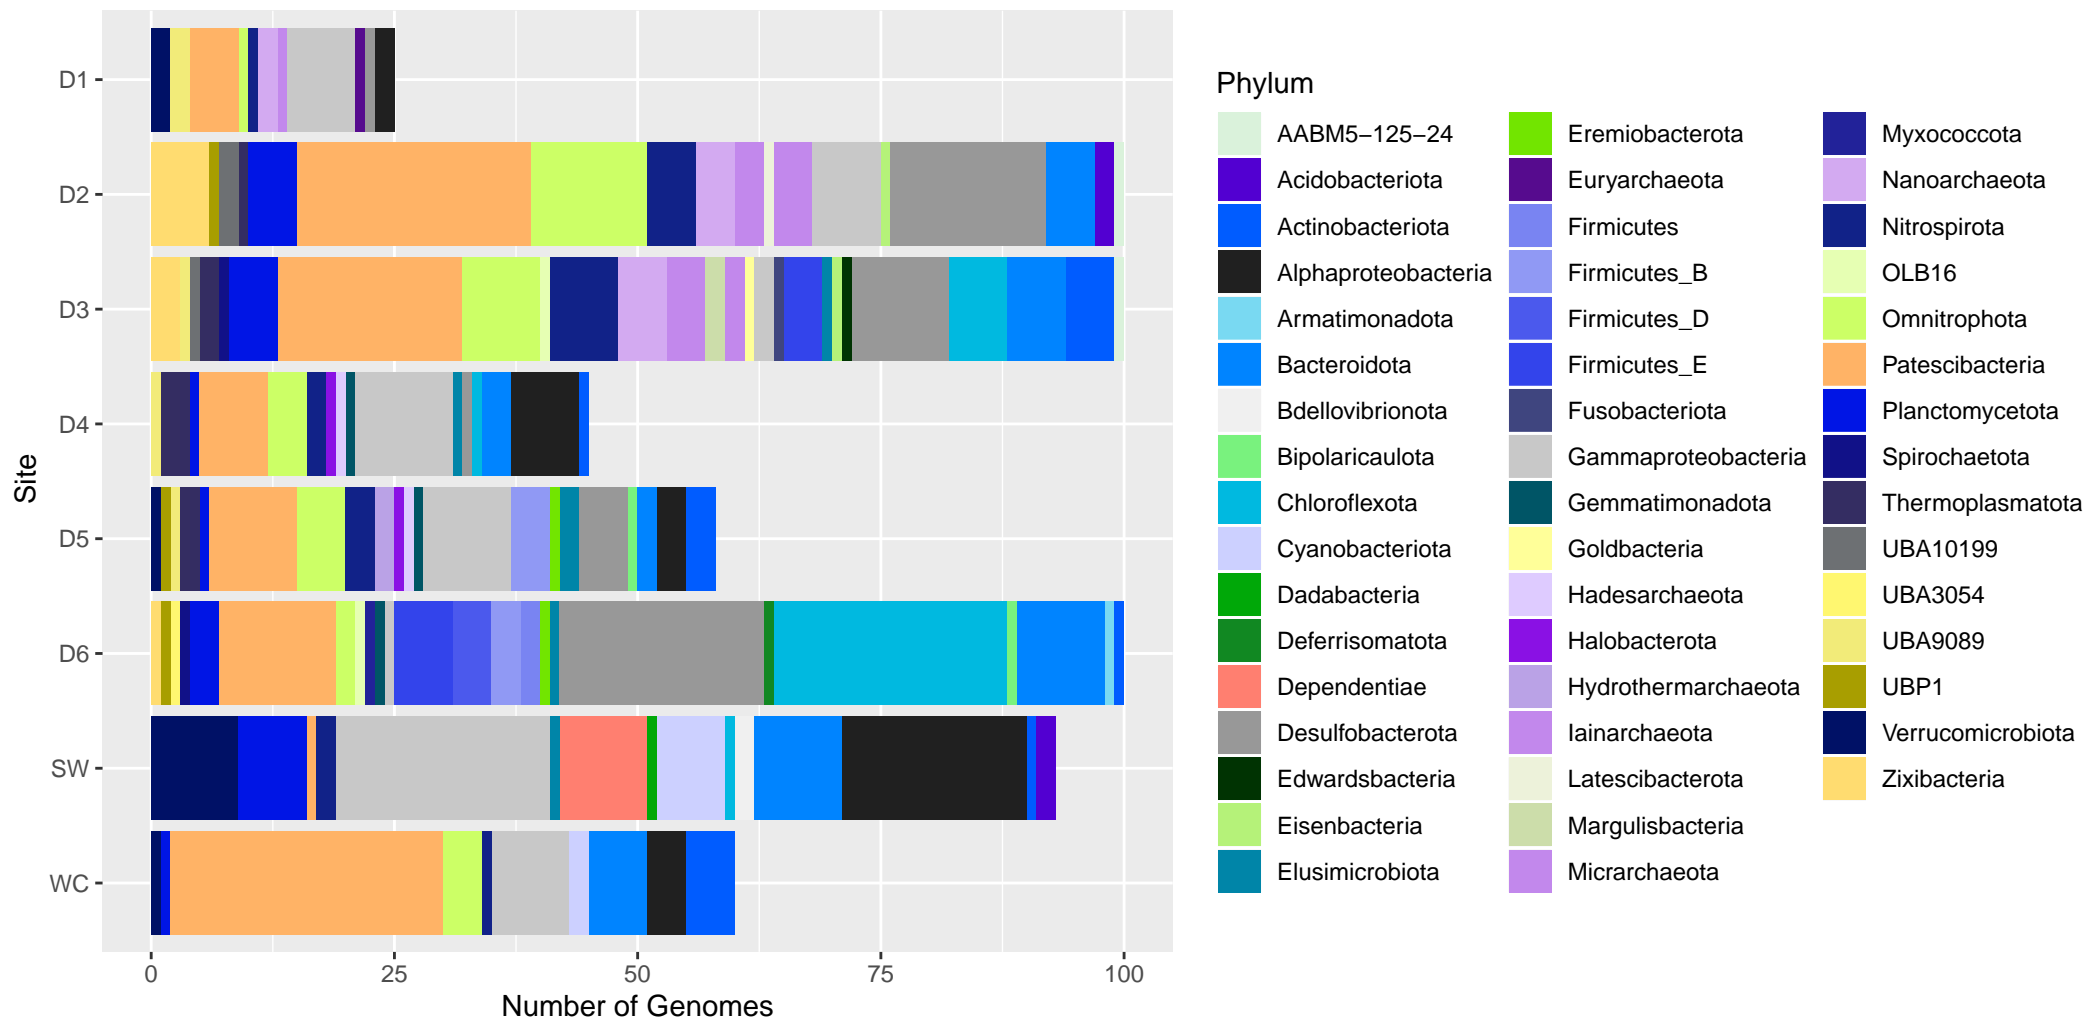

## B. Archaea

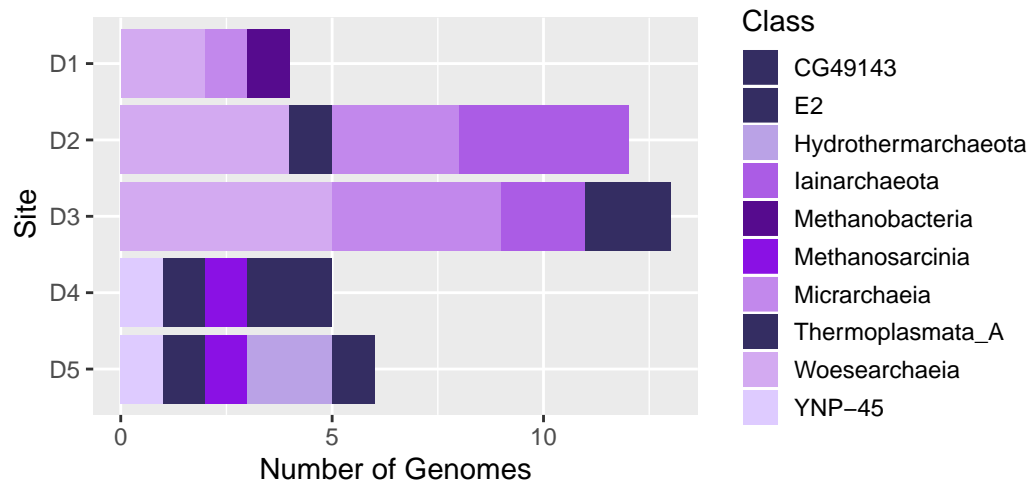

## C. Candidate Phyla Radiation

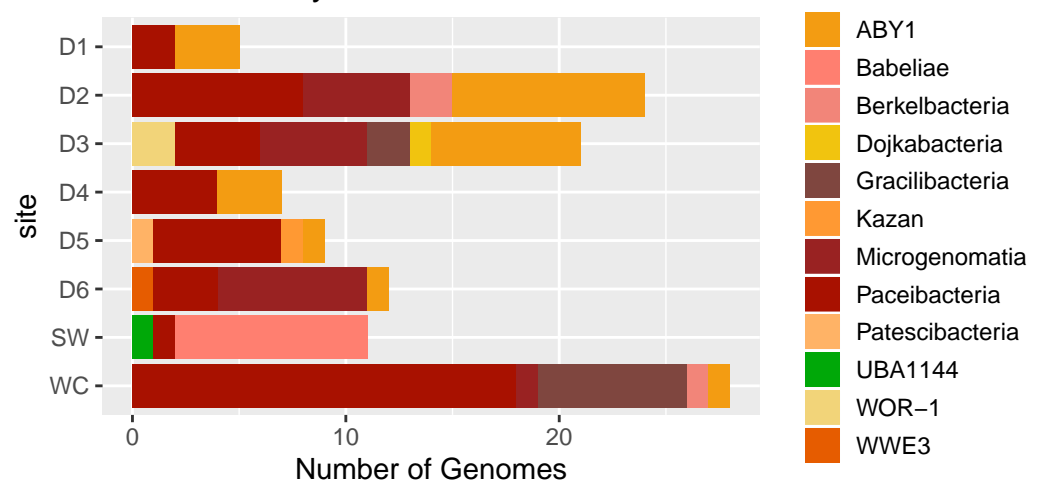

Beta

Alpha

bioRxiv preprint doi: <https://doi.org/10.1101/2021.05.06.442964>; this version posted May 6, 2021. The copyright holder for this preprint (which was not certified by peer review) is the author/funder. All rights reserved. No reuse allowed without permission.

Gamma

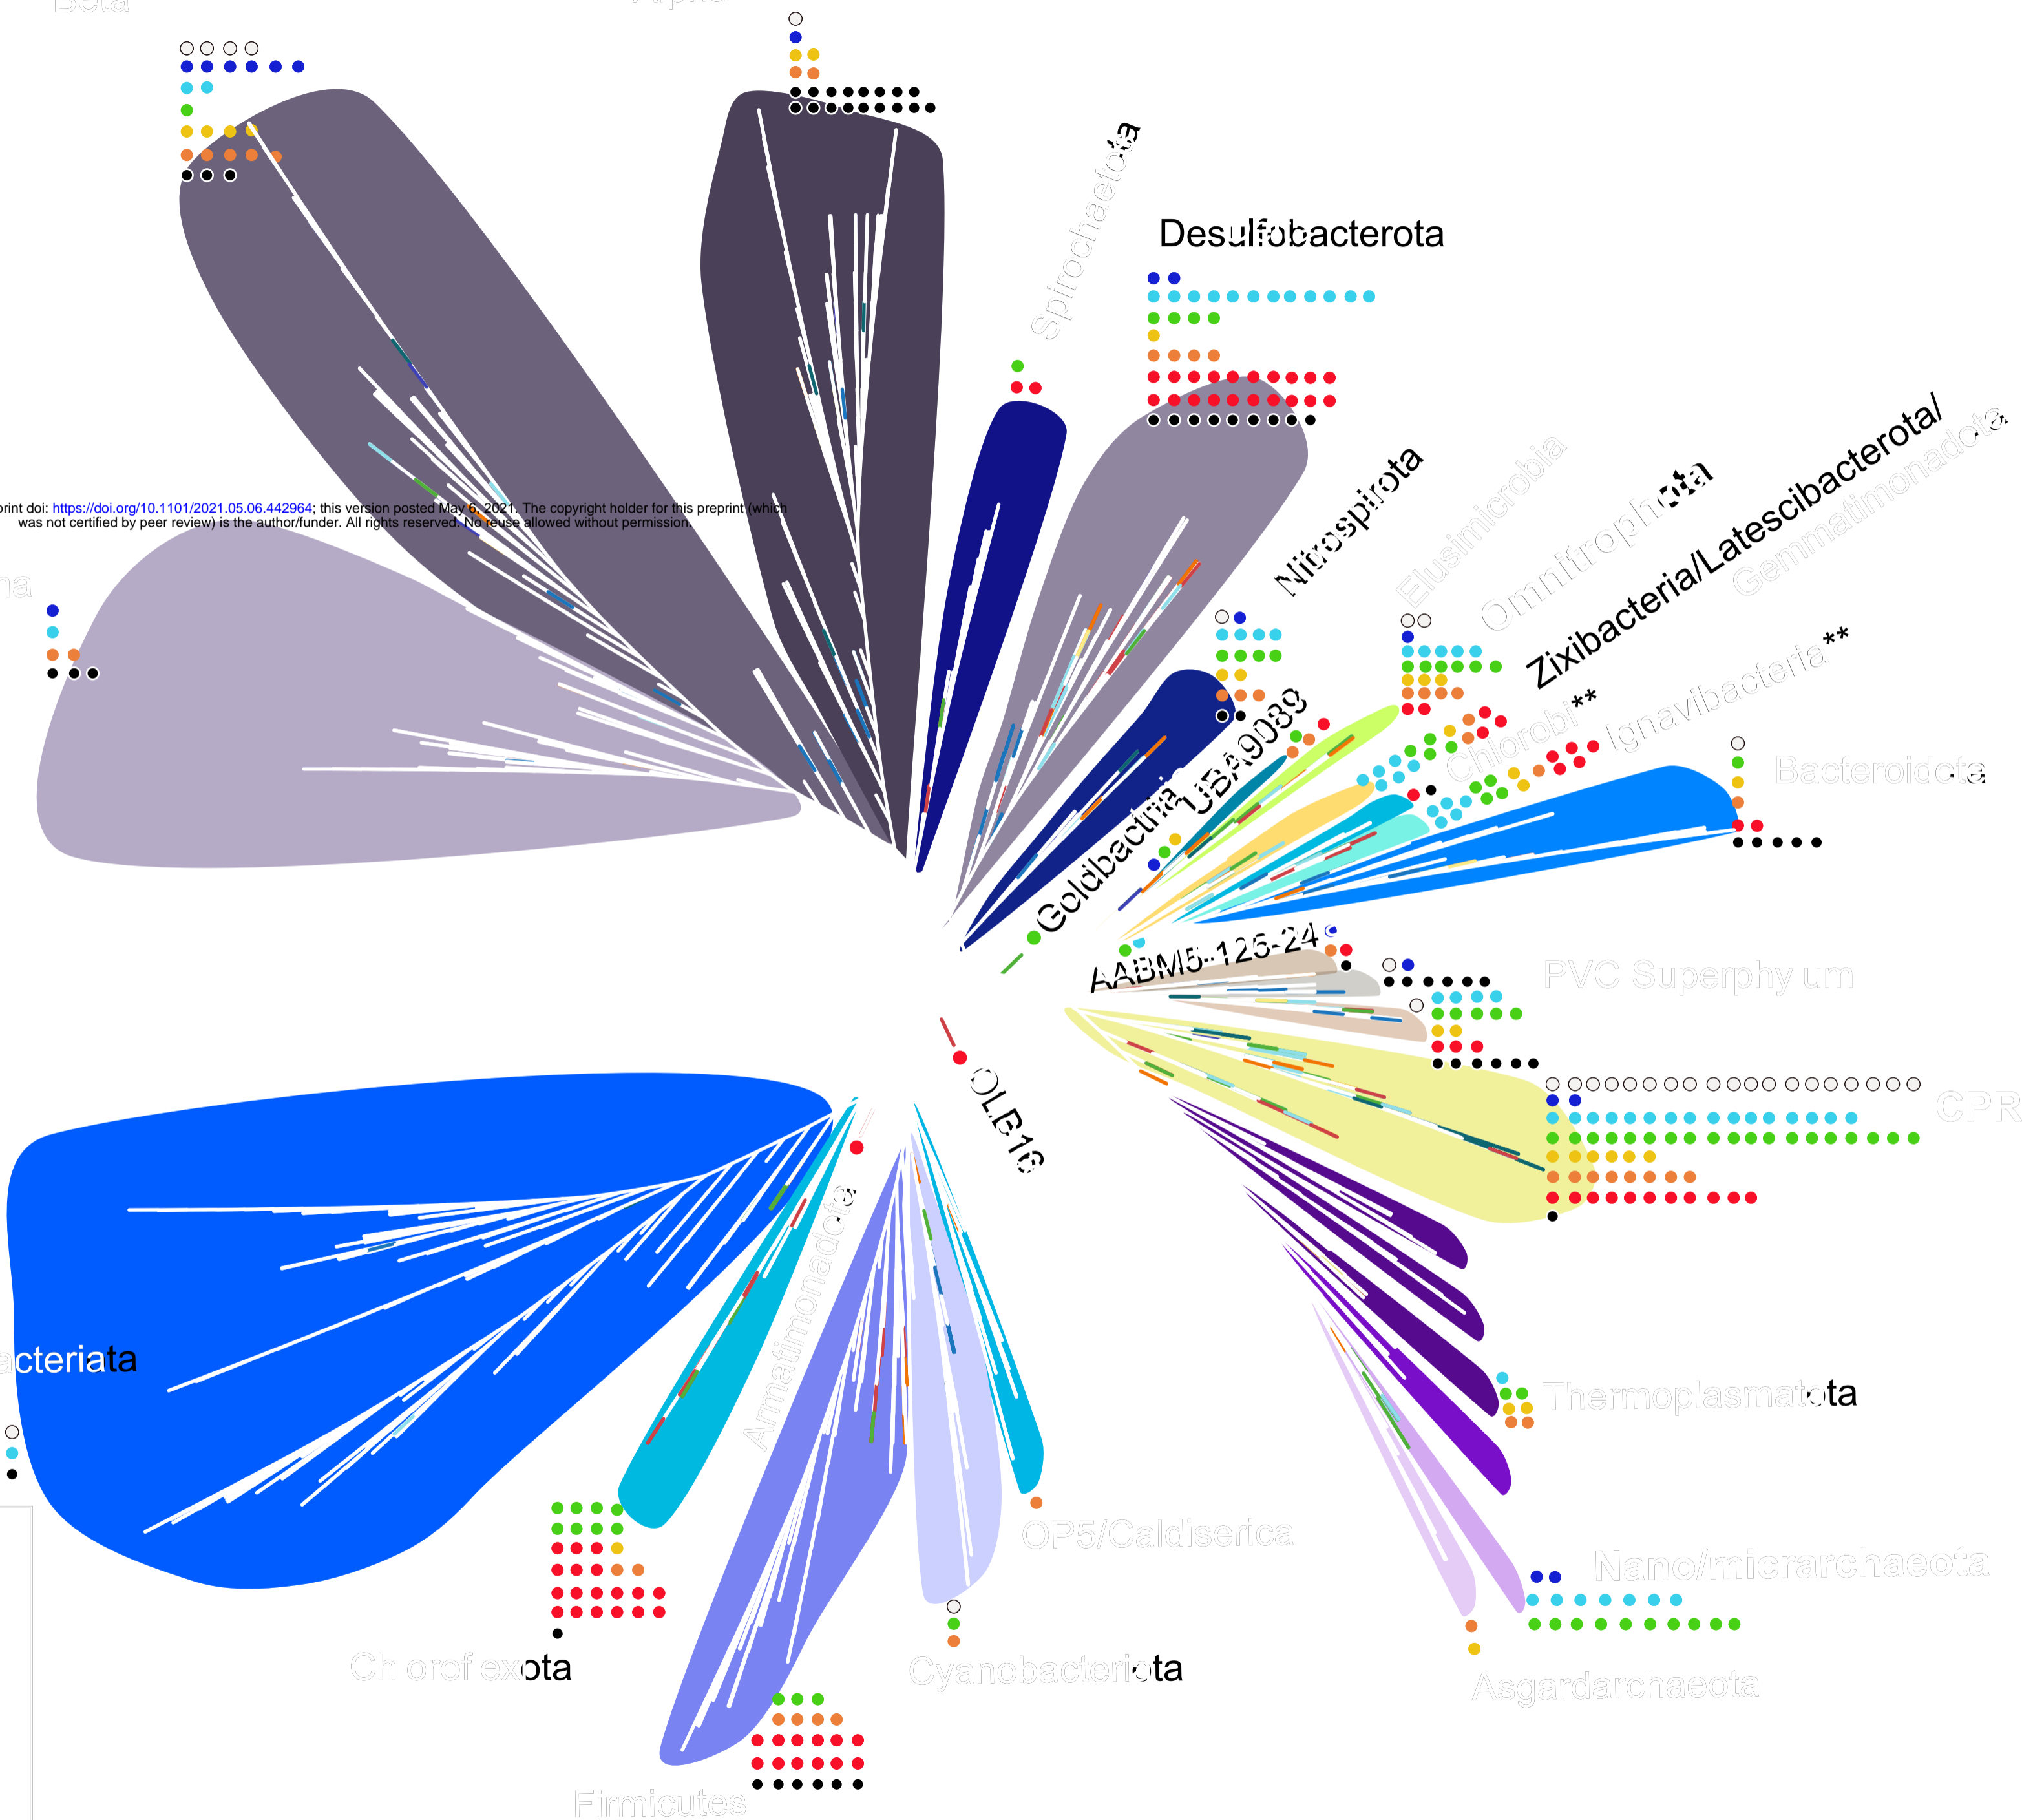

**Legend**

- D1
- D2
- D3
- D4
- D5
- D6
- SW
- WC



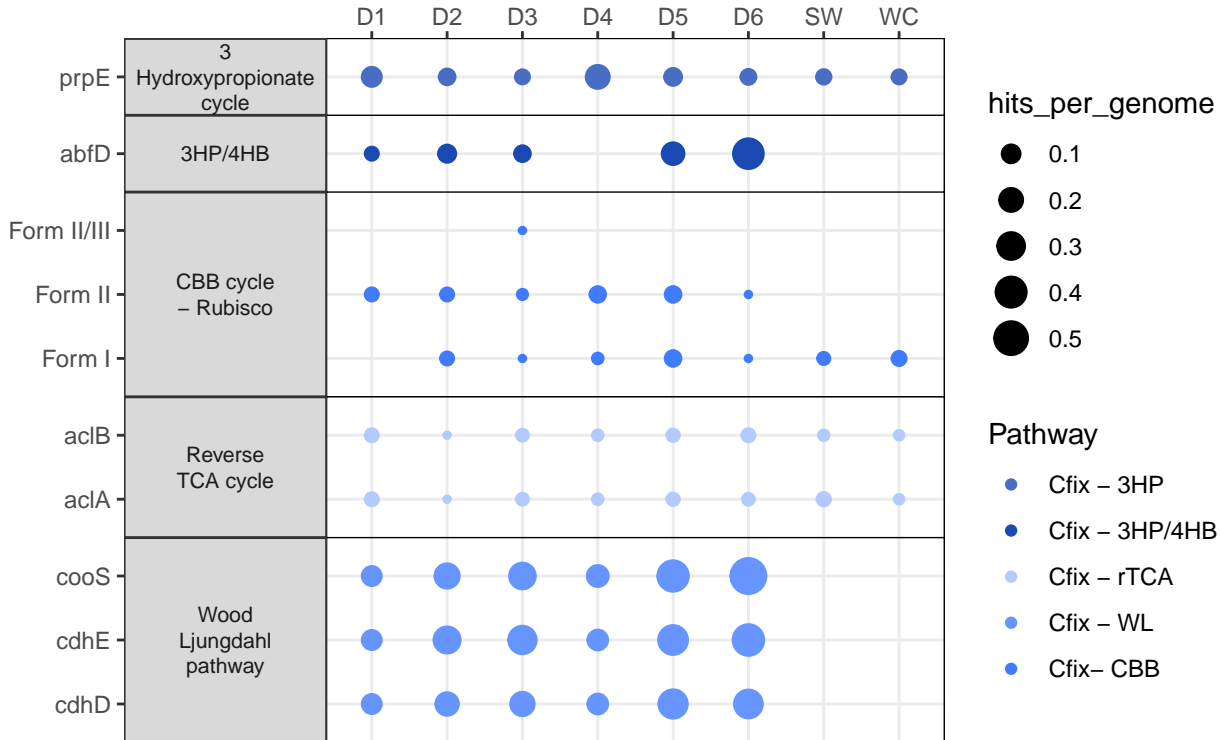



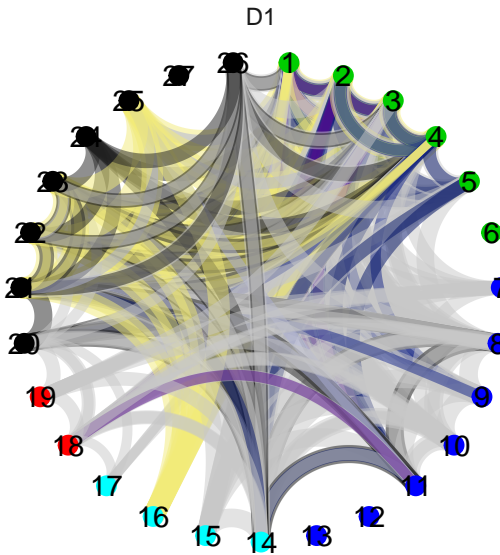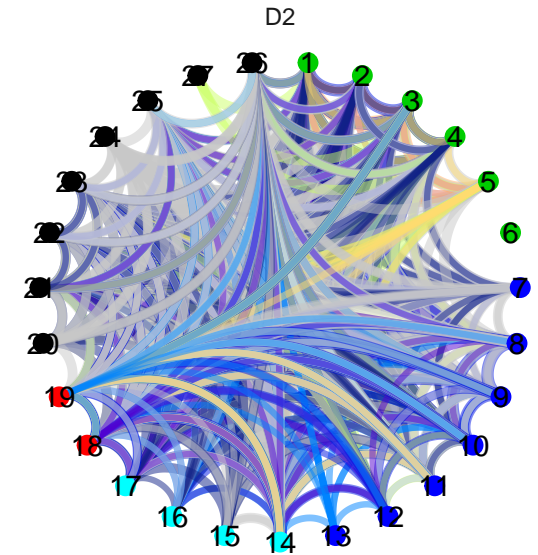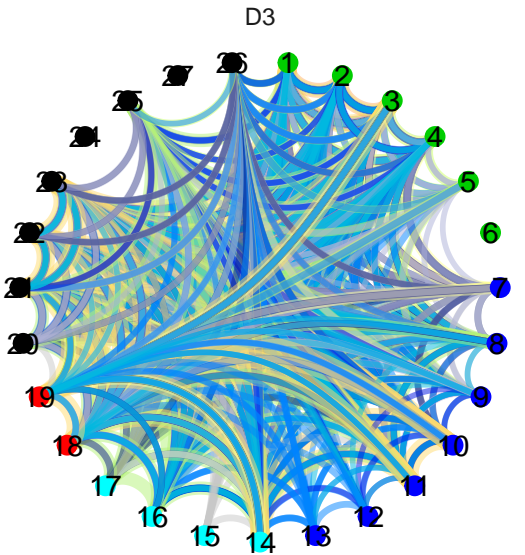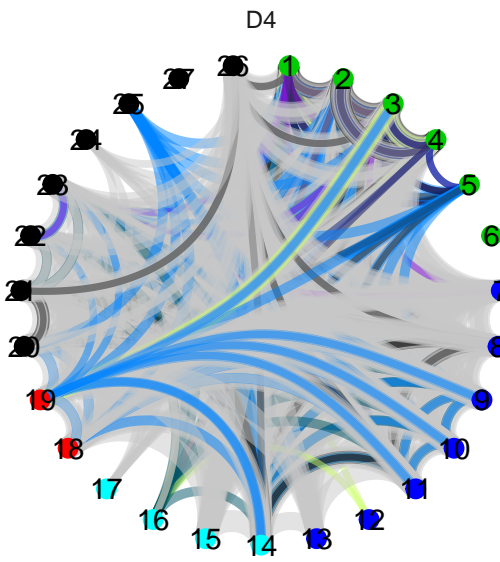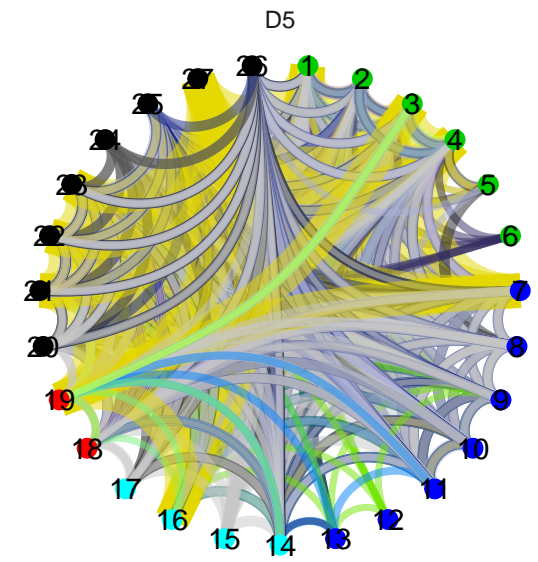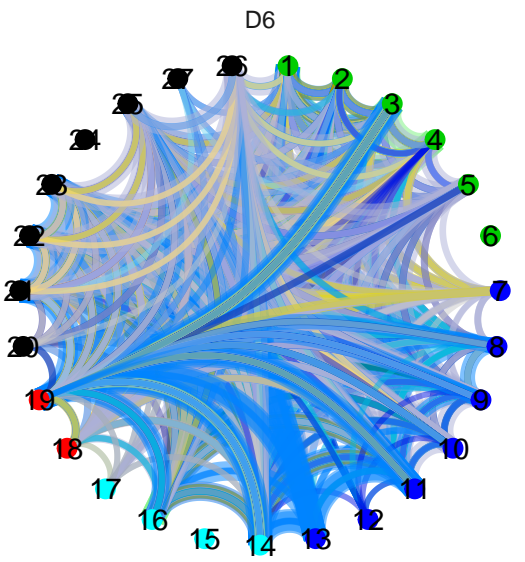

Taxonomic Group

- |                     |                     |                   |
|---------------------|---------------------|-------------------|
| AABM5-125-24        | Firmicutes          | Myxococcota       |
| Acidobacteriota     | Firmicutes_B        | Nanoarchaeota     |
| Actinobacteriota    | Firmicutes_D        | Nitrospirota      |
| Alphaproteobacteria | Firmicutes_E        | OLB16             |
| Armatimonadota      | Fusobacteriota      | Omnitrophota      |
| Bacteroidota        | Gammaproteobacteria | Patescibacteria   |
| Bipolaricaulota     | Gemmatimonadota     | Planctomycetota   |
| Chloroflexota       | Goldbacteria-1      | Spirochaetota     |
| Deferrisomatota     | Hadesarchaeota      | Thermoplasmatota  |
| Desulfobacterota    | Halobacterota       | UBA10199          |
| Edwardsbacteria     | JdFR-18             | UBA3054           |
| Eisenbacteria       | Latescibacterota    | UBA9089           |
| Elusimicrobiota     | Margulisbacteria    | UBP1              |
| Eremiobacterota     | MBNT15              | Verrucomicrobiota |
| Euryarchaeota       | Micrarchaeota       | Zixibacteria      |

Coverage value(average)

- 0.04
- 0.08
- 0.12

Table 1. Measurements of geochemical constituents collected concomitantly with biological samples for DNA e

| Site    | Date      | Flow rate<br>mL/min | Temp<br>(°C) | Conductivity<br>( $\mu$ S) | TDS<br>ppm | pH   | ORP<br>(mV) | NO <sub>3</sub> <sup>-</sup><br>mg/L | NH <sub>4</sub> <sup>+</sup><br>mg/L |
|---------|-----------|---------------------|--------------|----------------------------|------------|------|-------------|--------------------------------------|--------------------------------------|
| DeMMO 1 | 4/18/2018 | 3000                | 10.5         | 1045                       | 756        | 5.83 | -68         | 0.3                                  | 0.06                                 |
| DeMMO 2 | 4/18/2018 | 300                 | 12           | 609.4                      | 430.4      | 7.44 | -100        | 0.3                                  | 0.03                                 |
| DeMMO 3 | 4/17/2018 | 4600                | 16.1         | 3082                       | 2349       | 7.13 | -61         | 0.3                                  | 0.21                                 |
| DeMMO 4 | 4/19/2018 | 300                 | 22.2         | 1781                       | 1302       | 7.46 | -200        | 1.1                                  | 1.36                                 |
| DeMMO 5 | 4/16/2018 | 15600               | 31.6         | 1534                       | 1103       | 8.45 | -149        | 0.7                                  | 0.48                                 |
| DeMMO 6 | 4/16/2018 | 0                   | 20.1         | 7933                       | 6602       | 6.61 | -198        | 0.3                                  | 0                                    |

\*Dissolved gas concentrations were not measured on the day of collection in April of 2018. We have used an av

extraction and sequencing

| Fe <sup>2+</sup> | Total sulfide | DO    | SO <sub>4</sub> <sup>2-</sup> | Total Fe | Total Mn | DOC   | DIC   | H <sub>2</sub> * | CH <sub>4</sub> * |
|------------------|---------------|-------|-------------------------------|----------|----------|-------|-------|------------------|-------------------|
| mg/L             | μg/L          | mg/L  | mg/L                          | mg/L     | mg/L     | mg/L  | mM    | mg/L             | mg/L              |
| 2.32             | 6             | 0.025 | 393                           | 6.08     | 0.288    | 0.468 | 3.81  | 1.19E-07         | 7.75E-06          |
| 0.31             | 0             | 0.054 | 84.8                          | 0.35     | 0.052    | 0.393 | 4.02  | 1.42E-07         | 5.85E-06          |
| 2.86             | 5             | 0.029 | 1800                          | 3.3      | 0.297    | 0.25  | 9.46  | 2.68E-07         | 6.88E-05          |
| 0                | 582           | 0.031 | 315                           | 0.03     | 0.005    | 0.244 | 11.31 | 2.16E-07         | 0.000719          |
| 0                | 254           | 0.015 | 186                           | 0        | 0        | 0.316 | 10.96 | 1.98E-07         | 0.000346          |
| 1.47             | 13            | 0     | 4110                          | 2.44     | 0.375    | 0.286 | 1.86  | 3.05E-07         | 0.005041          |

eraged value from measurements taken December 2015-December 2019 in corresponding boreholes.

| CO <sub>2</sub> * | CO *     |
|-------------------|----------|
| mg/L              | mg/L     |
| 0.022831          | 5.56E-06 |
| 0.017753          | 4.94E-06 |
| 0.091982          | 8.19E-06 |
| 0.013094          | 3.54E-06 |
| 0.00477           | 4.14E-06 |
| 0.002487          | 2.52E-06 |
